# Supplementary material
Source: HighWire-hosted journal article supplement (http://www.ajevonline.org/highwire/filestream/1938/field_highwire_adjunct_files/0/Supplemental_Data.pdf)
Supplement: Supplemental_Data.pdf [file Supplemental_Data.pdf]

## Supplemental Data for:

Richter, C.L., A.D. Kennedy, L. Guo, and N. Dokoozlian

Metabolomic measurements at three time points of a Chardonnay wine fermentation with *Saccharomyces cerevisiae*.

Am. J. Enol. Vitic. 66:294-301. doi: 10.5344/ajev.2015.14062.

**Supplemental Table 1** The complete yeast endo-metabolome identified in this study. Compound names are reported, as well as their CAS, PUBCHEM, and KEGG identifiers. The biological pathway to which the compound belongs, the method of identification, the retention index (RI), and size of the metabolite are also listed. Normalized concentrations of each compound are shown at the three time points. Data for each compound were rescaled to a median equal to 1.

| Compound                          | Concentration |       |        | Super pathway | Subpathway                                  | Platform  | RI     | Mass   | Identifier        |                   |                               |
|-----------------------------------|---------------|-------|--------|---------------|---------------------------------------------|-----------|--------|--------|-------------------|-------------------|-------------------------------|
|                                   | Day 4         | Day 9 | Day 15 |               |                                             |           |        |        | CAS               | PUBCHEM           | KEGG                          |
| 2-Aminobutyrate                   | 5.33          | 0.89  | 0.26   | Amino acid    | Butanoate metabolism                        | GC-MS     | 1215.7 | 130    | 1492-24-6;        | 4,396,916,971,251 | <a href="#">C02261</a>        |
| 2-Hydroxy-3-methylvalerate        | 1.04          | 0.97  | 0.50   | Amino acid    | Valine, leucine and isoleucine metabolism   | GC-MS     | 1281   | 159.09 | 488-15-3;         | 164623            |                               |
| 3-(4-Hydroxyphenyl)lactate (HPLA) | 0.78          | 0.70  | 1.32   | Amino acid    | Phenylalanine & tyrosine metabolism         | LC-MS Neg | 1395   | 181.1  | 6482-98-0;        | 9378              | <a href="#">C03672</a>        |
| 3-Hydroxyanthranilate             | 1.07          | 0.97  | 0.97   | Amino acid    | Tryptophan metabolism                       | LC-MS Pos | 2280   | 154.1  | 548-93-6;         | 86                | <a href="#">C00632</a>        |
| 3-Methylhistidine                 | 1.15          | 0.63  | 0.63   | Amino acid    | Histidine metabolism                        | GC-MS     | 1799.7 | 218.1  | 368-16-1;         | 649,696,971,061   | <a href="#">C01152</a>        |
| 4-Acetamidobutanoate              | 1.03          | 0.39  | 0.45   | Amino acid    | Guanidino and acetamido metabolism          | LC-MS Pos | 1724   | 146.1  | 3025-96-5;        | 18189             | <a href="#">C02946</a>        |
| 4-Guanidinobutanoate              | 0.88          | 0.95  | 0.56   | Amino acid    | Guanidino and acetamido metabolism          | LC-MS Pos | 1085   | 146.1  | 463-003;463-00-3; | 500               | <a href="#">C01035</a>        |
| 5-Aminovalerate                   | 7.53          | 0.92  | 0.08   | Amino acid    | Urea cycle; arginine and proline metabolism | GC-MS     | 1620.8 | 174    | 660-88-8;         | 6,992,101,138     | <a href="#">C00431</a>        |
| 5-Methylthioadenosine (MTA)       | 1.65          | 0.78  | 0.10   | Amino acid    | Polyamine metabolism                        | LC-MS Pos | 2427   | 298.1  | 2457-80-9;        | 439176            | <a href="#">C00170</a>        |
| 5-Oxoproline                      | 0.67          | 1.63  | 2.12   | Amino acid    | Glutathione metabolism                      | LC-MS Neg | 744    | 128.2  | 98-79-3;          | 7405              | <a href="#">C01879</a>        |
| Alanine                           | 2.34          | 1.10  | 0.09   | Amino acid    | Alanine and aspartate metabolism            | GC-MS     | 1147.6 | 115.9  | 56-41-7;          | 59,507,311,724    | <a href="#">C00041</a>        |
| allo-Threonine                    | 5.16          | 0.79  | 0.09   | Amino acid    | Glycine, serine, and threonine metabolism   | GC-MS     | 1417.8 | 219    | 28954-12-3;       | 992,896,995,276   | <a href="#">C05519</a>        |
| a-Hydroxyisocaproate              | 0.82          | 0.95  | 0.25   | Amino acid    | Valine, leucine, and isoleucine metabolism  | LC-MS Neg | 1854   | 131.2  | 10303-64-7;       | 83697             | <a href="#">C03264</a>        |
| a-Hydroxyisovalerate              | 0.95          | 0.37  | 0.17   | Amino acid    | Valine, leucine, and isoleucine metabolism  | GC-MS     | 1208   | 145.1  | 600-37-3;         | 99823             |                               |
| Anthranilate                      | 3.67          | 0.37  | 0.44   | Amino acid    | Tryptophan metabolism                       | LC-MS Pos | 3213   | 138.1  | 118-92-3;         | 3,734,162,227     | <a href="#">C00108</a>        |
| Arginine                          | 2.42          | 1.29  | 0.43   | Amino acid    | Urea cycle; arginine and proline metabolism | LC-MS Neg | 728    | 173.2  | 1119-34-2;        | 5,246,487,232     | <a href="#">C00062</a>        |
| Argininosuccinate                 | 2.43          | 1.10  | 0.58   | Amino acid    | Urea cycle; arginine and proline metabolism | LC-MS Pos | 689    | 291.2  | 156637-58-0;      | 828               | <a href="#">C03406</a>        |
| Asparagine                        | 1.02          | 1.30  | 0.11   | Amino acid    | Alanine and aspartate metabolism            | GC-MS     | 1617.5 | 188    | 70-47-3;          | 62,676,992,089    | <a href="#">C00152</a>        |
| Aspartate                         | 2.14          | 0.75  | 0.05   | Amino acid    | Alanine and aspartate metabolism            | GC-MS     | 1529.7 | 232    | 56-84-8;          | 5960              | <a href="#">C00049</a>        |
| b-Alanine                         | 2.05          | 0.71  | 0.43   | Amino acid    | Alanine and aspartate metabolism            | GC-MS     | 1451.8 | 174    | 56-41-7;107-95-9; | 2,394,755,801     | <a href="#">C00099</a>        |
| b-Hydroxypyruvate                 | 0.64          | 0.96  | 1.61   | Amino acid    | Glycine, serine, and threonine metabolism   | GC-MS     | 1425.1 | 221    | 3369-79-7;        | 964               | <a href="#">C00168</a>        |
| Betaine                           | 1.02          | 0.70  | 1.56   | Amino acid    | Glycine, serine, and threonine metabolism   | LC-MS Pos | 721    | 118.2  | 107-43-7;         | 247               |                               |
| Citramalate                       | 1.11          | 1.51  | 1.73   | Amino acid    | Valine, leucine, and isoleucine metabolism  | GC-MS     | 1490.7 | 247    | 6236-10-8;        | 1081              | <a href="#">C02612,C00815</a> |

## Supplemental Data for:

Richter, C.L., A.D. Kennedy, L. Guo, and N. Dokoozlian

Metabolomic measurements at three time points of a Chardonnay wine fermentation with *Saccharomyces cerevisiae*.

Am. J. Enol. Vitic. 66:294-301. doi: 10.5344/ajev.2015.14062.

**Supplemental Table 1** The complete yeast endo-metabolome identified in this study. Compound names are reported, as well as their CAS, PUBCHEM, and KEGG identifiers. The biological pathway to which the compound belongs, the method of identification, the retention index (RI), and size of the metabolite are also listed. Normalized concentrations of each compound are shown at the three time points. Data for each compound were rescaled to a median equal to 1.

| Compound                        | Concentration |       |        | Super pathway | Subpathway                                    | Platform  | RI     | Mass  | Identifier       |                   |                               |
|---------------------------------|---------------|-------|--------|---------------|-----------------------------------------------|-----------|--------|-------|------------------|-------------------|-------------------------------|
|                                 | Day 4         | Day 9 | Day 15 |               |                                               |           |        |       | CAS              | PUBCHEM           | KEGG                          |
| Cystathionine                   | 1.78          | 0.93  | 0.11   | Amino acid    | Cysteine, methionine, SAM, taurine metabolism | GC-MS     | 1979.6 | 218.1 | 535-34-2;        | 4,083,111,834     | <a href="#">C02291</a>        |
| Cysteine                        | 1.07          | 1.04  | 0.50   | Amino acid    | Cysteine, methionine, SAM, taurine metabolism | GC-MS     | 1560.1 | 218   | 52-90-4;56-89-3; | 58,626,419,722    | <a href="#">C00097</a>        |
| Dimethylarginine (ADMA + SDMA)  | 0.80          | 1.10  | 0.20   | Amino acid    | Urea cycle; arginine and proline metabolism   | LC-MS Pos | 812    | 203.2 |                  | 123831            | <a href="#">C03626</a>        |
| g-Aminobutyrate (GABA)          | 0.78          | 3.12  | 0.61   | Amino acid    | Glutamate metabolism                          | GC-MS     | 1539.7 | 304.1 | 56-12-2;         | 6,992,099,119     | <a href="#">C00334</a>        |
| Gentisate                       | 0.50          | 1.04  | 1.41   | Amino acid    | Phenylalanine and tyrosine metabolism         | LC-MS Neg | 1460   | 153.1 | 490-79-9;        | 3469              | <a href="#">C00628</a>        |
| Glutamate                       | 4.28          | 0.95  | 0.82   | Amino acid    | Glutamate metabolism                          | LC-MS Pos | 700    | 148.1 | 56-86-0;         | 611               | <a href="#">C00025</a>        |
| Glutamate, g-methyl ester       | 8.91          | 1.23  | 0.11   | Amino acid    | Glutamate metabolism                          | LC-MS Pos | 1062   | 162.1 | 1499-55-4;       | 73913             |                               |
| Glutamine                       | 0.87          | 1.11  | 0.43   | Amino acid    | Glutamate metabolism                          | LC-MS Pos | 684    | 147.2 | 56-85-9;         | 69,920,865,961    | <a href="#">C00064</a>        |
| Glutarate (pentanedioate)       | 1.06          | 1.93  | 0.28   | Amino acid    | Lysine metabolism                             | GC-MS     | 1433.6 | 261   | 110-94-1;        | 4418048           | <a href="#">C00489</a>        |
| Glutathione, oxidized (GSSG)    | 1.88          | 0.98  | 0.16   | Amino acid    | Glutathione metabolism                        | LC-MS Pos | 1535   | 613.1 | 103239-24-3;     | 6,535,911,215,652 | <a href="#">C00127</a>        |
| Glutathione, reduced (GSH)      | 1.33          | 0.82  | 0.09   | Amino acid    | Glutathione metabolism                        | LC-MS Pos | 1274   | 308.1 | 70-18-8;         | 124886            | <a href="#">C00051</a>        |
| Glycine                         | 4.21          | 0.82  | 0.07   | Amino acid    | Glycine, serine, and threonine metabolism     | GC-MS     | 1166   | 101.9 | 56-40-6;         | 5,257,127,750     | <a href="#">C00037</a>        |
| Histidine                       | 2.66          | 0.72  | 0.04   | Amino acid    | Histidine metabolism                          | GC-MS     | 1837.3 | 154   | 5934-29-2;       | 7,733,651,426     | <a href="#">C00135</a>        |
| Homocysteine                    | 2.32          | 0.86  | 0.08   | Amino acid    | Cysteine, methionine, SAM, taurine metabolism | GC-MS     | 1648.2 | 234   | 454-29-5;        | 778               | <a href="#">C00155</a>        |
| Homoserine (homoserine lactone) | 2.18          | 1.00  | 0.54   | Amino acid    | Glycine, serine, and threonine metabolism     | GC-MS     | 1471   | 218.1 | 672-15-1;        | 126,476,971,022   | <a href="#">C00263,C02926</a> |
| Homoserine lactone              | 1.07          | 1.15  | 0.12   | Amino acid    | Glycine, serine, and threonine metabolism     | GC-MS     | 1296   | 130   | 2185-02-6;       | 445963            | <a href="#">C02926</a>        |
| Imidazole lactate               | 1.88          | 0.64  | 0.74   | Amino acid    | Histidine metabolism                          | LC-MS Pos | 778    | 157.1 | 14403-45-3;      | 440129            | <a href="#">C05568</a>        |
| Isoleucine                      | 3.20          | 1.06  | 0.22   | Amino acid    | Valine, leucine, and isoleucine metabolism    | LC-MS Pos | 1614   | 132.1 | 73-32-5;         | 791               | <a href="#">C00407</a>        |
| Kynurenate                      | 7.86          | 0.58  | 1.10   | Amino acid    | Tryptophan metabolism                         | LC-MS Neg | 2243   | 188.1 | 492-27-3;        | 3845              | <a href="#">C01717</a>        |
| Kynurenine                      | 20.05         | 1.28  | 0.33   | Amino acid    | Tryptophan metabolism                         | LC-MS Pos | 1902   | 209.1 | 2922-83-0;       | 1,611,666,971,029 | <a href="#">C00328</a>        |
| Leucine                         | 1.85          | 1.07  | 0.38   | Amino acid    | Valine, leucine, and isoleucine metabolism    | LC-MS Pos | 1674   | 132.2 | 61-90-5;         | 70,457,986,106    | <a href="#">C00123</a>        |
| Lysine                          | 2.70          | 0.63  | 0.03   | Amino acid    | Lysine metabolism                             | GC-MS     | 1679   | 156.1 | 56-87-1;         | 5962              | <a href="#">C00047</a>        |
| Methionine                      | 2.97          | 1.07  | 0.37   | Amino acid    | Cysteine, methionine, SAM, taurine metabolism | LC-MS Pos | 1252   | 150.1 | 63-68-3;         | 69,920,876,137    | <a href="#">C00073</a>        |
| N-Acetylalanine                 | 0.74          | 1.11  | 0.18   | Amino acid    | Alanine and aspartate metabolism              | LC-MS Neg | 882    | 130.1 | 97-69-8;         | 88064             | <a href="#">C02847</a>        |

## Supplemental Data for:

Richter, C.L., A.D. Kennedy, L. Guo, and N. Dokoozlian

Metabolomic measurements at three time points of a Chardonnay wine fermentation with *Saccharomyces cerevisiae*.

Am. J. Enol. Vitic. 66:294-301. doi: 10.5344/ajev.2015.14062.

**Supplemental Table 1** The complete yeast endo-metabolome identified in this study. Compound names are reported, as well as their CAS, PUBCHEM, and KEGG identifiers. The biological pathway to which the compound belongs, the method of identification, the retention index (RI), and size of the metabolite are also listed. Normalized concentrations of each compound are shown at the three time points. Data for each compound were rescaled to a median equal to 1.

| Compound                             | Concentration |       |        | Super pathway | Subpathway                                    | Platform  | RI     | Mass  | Identifier  |                   |                        |
|--------------------------------------|---------------|-------|--------|---------------|-----------------------------------------------|-----------|--------|-------|-------------|-------------------|------------------------|
|                                      | Day 4         | Day 9 | Day 15 |               |                                               |           |        |       | CAS         | PUBCHEM           | KEGG                   |
| <i>N</i> -Acetylarginine             | 4.90          | 1.59  | 0.12   | Amino acid    | Urea cycle; arginine and proline metabolism   | LC-MS Neg | 1149   | 215.2 | 155-84-0;   | 674,271,615,663   | <a href="#">C02562</a> |
| <i>N</i> -Acetylasparagine           | 0.99          | 1.50  | 0.58   | Amino acid    | Alanine and aspartate metabolism              | LC-MS Pos | 974    | 175.1 | 4033-40-3;  | 99715             |                        |
| <i>N</i> -Acetylglutamine            | 2.44          | 1.18  | 0.30   | Amino acid    | Glutamate metabolism                          | LC-MS Pos | 1204   | 189.1 | 2490-97-3;  | 182230            | <a href="#">C02716</a> |
| <i>N</i> -Acetylglycine              | 1.78          | 1.04  | 0.47   | Amino acid    | Glycine, serine, and threonine metabolism     | GC-MS     | 1396.4 | 143.9 | 543-24-8;   | 10972             |                        |
| <i>N</i> -Acetylhistidine            | 2.28          | 1.36  | 0.31   | Amino acid    | Histidine metabolism                          | LC-MS Pos | 843    | 198.1 | 39145-52-3; | 75619             | <a href="#">C02997</a> |
| <i>N</i> -Acetylleucine              | 4.75          | 0.83  | 1.07   | Amino acid    | Valine, leucine, and isoleucine metabolism    | LC-MS Pos | 3444   | 174.1 | 1188-21-2;  | 70912             | <a href="#">C02710</a> |
| <i>N</i> -Acetylmethionine           | 2.77          | 0.95  | 0.45   | Amino acid    | Cysteine, methionine, SAM, taurine metabolism | LC-MS Neg | 1805   | 190.1 | 65-82-7;    | 448580            | <a href="#">C02712</a> |
| <i>N</i> -Acetylphenylalanine        | 1.42          | 0.23  | 0.39   | Amino acid    | Phenylalanine and tyrosine metabolism         | LC-MS Pos | 3563   | 208.1 | 2018-61-3;  | 74839             | <a href="#">C03519</a> |
| <i>N</i> -Acetylproline              | 2.50          | 0.85  | 0.52   | Amino acid    | Urea cycle; arginine-, proline-, metabolism   | LC-MS Pos | 2184   | 158.1 | 1074-79-9;  | 322640            |                        |
| <i>N</i> -Acetyltyrosine             | 2.92          | 0.38  | 0.37   | Amino acid    | Phenylalanine and tyrosine metabolism         | LC-MS Neg | 1677   | 222.2 | 537-55-3;   | 68310             |                        |
| <i>N</i> <sub>ε</sub> -Acetyllysine  | 0.88          | 0.54  | 0.10   | Amino acid    | Lysine metabolism                             | LC-MS Pos | 1134   | 189.1 | 692-04-6;   | 699,197,892,832   | <a href="#">C02727</a> |
| Norphthalmate                        | 0.99          | 2.04  | 0.43   | Amino acid    | Glutathione metabolism                        | LC-MS Pos | 989    | 276.1 | 1116-21-8;  | 5489007           |                        |
| Ophthalmate                          | 2.31          | 0.57  | 0.16   | Amino acid    | Glutathione metabolism                        | LC-MS Pos | 1457   | 290.1 | 495-27-2;   | 9817431           |                        |
| Ornithine                            | 4.12          | 1.52  | 0.15   | Amino acid    | Urea cycle; arginine and proline metabolism   | GC-MS     | 1763.8 | 141.9 | 3184-13-2;  | 6262              | <a href="#">C00077</a> |
| <i>p</i> -Toluic Acid                | 0.93          | 0.57  | 0.71   | Amino acid    | Phenylalanine and tyrosine metabolism         | GC-MS     | 1400   | 193   | 99-94-5;    | 7470              | <a href="#">C01454</a> |
| Phenylalanine                        | 2.53          | 0.93  | 0.38   | Amino acid    | Phenylalanine and tyrosine metabolism         | LC-MS Pos | 2056   | 166.1 | 63-91-2;    | 69,256,656,140    | <a href="#">C00079</a> |
| Phenyllactate (PLA)                  | 0.87          | 1.07  | 0.74   | Amino acid    | Phenylalanine and tyrosine metabolism         | LC-MS Neg | 2237   | 165.1 | 828-01-3;   | 3848              | <a href="#">C05607</a> |
| Pipecolate                           | 1.70          | 0.76  | 0.23   | Amino acid    | Lysine metabolism                             | GC-MS     | 1396.1 | 156   | 4043-87-2;  | 849               | <a href="#">C00408</a> |
| Proline                              | 1.69          | 1.00  | 0.96   | Amino acid    | Urea cycle; arginine and proline metabolism   | LC-MS Pos | 796    | 116.1 | 147-85-3;   | 1,457,426,971,047 | <a href="#">C00148</a> |
| Pyroglutamine                        | 0.86          | 0.82  | 1.03   | Amino acid    | Glutamate metabolism                          | LC-MS Pos | 764    | 129.2 |             | 134508            |                        |
| <i>S</i> -Adenosylhomocysteine (SAH) | 6.24          | 0.83  | 0.35   | Amino acid    | Cysteine, methionine, SAM, taurine metabolism | LC-MS Pos | 1480   | 193.2 | 979-92-0;   |                   | <a href="#">C00021</a> |
| <i>S</i> -Adenosylmethionine (SAM)   | 0.62          | 1.45  | 0.63   | Amino acid    | Cysteine, methionine, SAM, taurine metabolism | LC-MS Pos | 676    | 399.1 | 24346-00-7; |                   |                        |
| <i>S</i> -Methylglutathione          | 7.22          | 1.21  | 0.29   | Amino acid    | Glutathione metabolism                        | LC-MS Pos | 1610   | 322.1 | 2922-56-7;  | 3605667           | <a href="#">C11347</a> |

## Supplemental Data for:

Richter, C.L., A.D. Kennedy, L. Guo, and N. Dokoozlian

Metabolomic measurements at three time points of a Chardonnay wine fermentation with *Saccharomyces cerevisiae*.

Am. J. Enol. Vitic. 66:294-301. doi: 10.5344/ajev.2015.14062.

**Supplemental Table 1** The complete yeast endo-metabolome identified in this study. Compound names are reported, as well as their CAS, PUBCHEM, and KEGG identifiers. The biological pathway to which the compound belongs, the method of identification, the retention index (RI), and size of the metabolite are also listed. Normalized concentrations of each compound are shown at the three time points. Data for each compound were rescaled to a median equal to 1.

| Compound                          | Concentration |       |        | Super pathway | Subpathway                                                   | Platform  | RI     | Mass  | Identifier   |                 |                        |
|-----------------------------------|---------------|-------|--------|---------------|--------------------------------------------------------------|-----------|--------|-------|--------------|-----------------|------------------------|
|                                   | Day 4         | Day 9 | Day 15 |               |                                                              |           |        |       | CAS          | PUBCHEM         | KEGG                   |
| Saccharopine                      | 0.60          | 1.06  | 0.75   | Amino acid    | Lysine metabolism                                            | LC-MS Pos | 695    | 277.1 | 997-68-2;    | 160556          | <a href="#">C00449</a> |
| Serine                            | 3.73          | 1.06  | 0.05   | Amino acid    | Glycine, serine, and threonine metabolism                    | GC-MS     | 1389.1 | 204   | 56-45-1;     | 59,516,857,581  | <a href="#">C00065</a> |
| Spermidine                        | 1.25          | 1.14  | 0.47   | Amino acid    | Polyamine metabolism                                         | LC-MS Pos | 533    | 146.2 | 124-20-9;    | 1102            | <a href="#">C00315</a> |
| Threonine                         | 3.83          | 0.91  | 0.43   | Amino acid    | Glycine, serine, and threonine metabolism                    | LC-MS Pos | 713    | 120.1 | 72-19-5;     | 69,710,196,288  | <a href="#">C00188</a> |
| Hydroxyproline                    | 2.20          | 0.98  | 0.66   | Amino acid    | Urea cycle; arginine and proline metabolism                  | GC-MS     | 1537   | 140   | 51-35-4;     | 58,106,971,053  | <a href="#">C01157</a> |
| Tryptophan                        | 2.27          | 0.85  | 0.42   | Amino acid    | Tryptophan metabolism                                        | LC-MS Pos | 2445   | 205.1 | 73-22-3;     | 69,235,166,305  | <a href="#">C00078</a> |
| Tyrosine                          | 4.35          | 0.89  | 0.31   | Amino acid    | Phenylalanine and tyrosine metabolism                        | LC-MS Pos | 1516   | 182.1 | 60-18-4;     | 60,576,942,100  | <a href="#">C00082</a> |
| Urea                              | 103.72        | 0.66  | 0.90   | Amino acid    | Urea cycle; arginine and proline metabolism                  | GC-MS     | 1223.9 | 171   | 57-13-6;     | 117,616,150,869 | <a href="#">C00086</a> |
| Valine                            | 3.19          | 0.98  | 0.15   | Amino acid    | Valine, leucine, and isoleucine metabolism                   | LC-MS Pos | 1040   | 118.1 | 72-18-4;     | 69,710,186,287  | <a href="#">C00183</a> |
| Xanthurenate                      | 0.60          | 1.08  | 1.62   | Amino acid    | Tryptophan metabolism                                        | LC-MS Pos | 2690   | 206.1 | 59-007;      | 5699            | <a href="#">C02470</a> |
| 2,3-Butanediol                    | 0.90          | 0.54  | 0.28   | Carbohydrate  | Glycolysis, gluconeogenesis, pyruvate metabolism             | GC-MS     | 1075   | 116.9 | 24347-58-8;  |                 | <a href="#">C03044</a> |
| 2-Isopropylmalate                 | 0.20          | 1.11  | 1.02   | Carbohydrate  | Glycolysis, gluconeogenesis, pyruvate metabolism             | LC-MS Pos | 2917   | 194.1 | 3237-44-3;   | 77              | <a href="#">C02504</a> |
| 3-Phosphoglycerate                | 1.60          | 1.51  | 0.09   | Carbohydrate  | Glycolysis, gluconeogenesis, pyruvate metabolism             | GC-MS     | 1756   | 299   | 80731-10-8;  |                 | <a href="#">C00597</a> |
| Arabinose                         | 0.26          | 0.99  | 1.17   | Carbohydrate  | Nucleotide sugars, pentose metabolism                        | GC-MS     | 1631.6 | 217   | 28697-53-2;  | 66308           | <a href="#">C00181</a> |
| Arabitol                          | 1.24          | 0.53  | 0.23   | Carbohydrate  | Nucleotide sugars, pentose metabolism                        | GC-MS     | 1687.5 | 217   | 488-82-4;    | 94154           | <a href="#">C00474</a> |
| Dihydroxyacetone phosphate (DHAP) | 0.22          | 0.64  | 0.22   | Carbohydrate  | Glycolysis, gluconeogenesis, pyruvate metabolism             | GC-MS     | 1737   | 315.1 | 102783-56-2; | 4643300         | <a href="#">C00111</a> |
| Erythronate                       | 1.25          | 0.90  | 0.91   | Carbohydrate  | Amino-sugar metabolism;                                      | GC-MS     | 1546.9 | 292.1 | 13752-84-6;  | 2781043         |                        |
| Fructose                          | 0.25          | 30.06 | 1.52   | Carbohydrate  | fructose, mannose, galactose, starch, and sucrose metabolism | GC-MS     | 1758   | 217   | 57-48-7;     | 5984            | <a href="#">C00095</a> |
| Fructose 6-phosphate              | 0.67          | 24.05 | 0.47   | Carbohydrate  | Glycolysis, gluconeogenesis, pyruvate metabolism             | GC-MS     | 1994.9 | 315.1 | 103213-47-4; |                 | <a href="#">C05345</a> |
| Galactinol                        | 1.08          | 1.01  | 1.02   | Carbohydrate  | Fructose, mannose, galactose, starch, and sucrose metabolism | GC-MS     | 2226.1 | 433.3 | 16908-86-4;  |                 | <a href="#">C01235</a> |
| Galactitol (dulcitol)             | 0.55          | 1.11  | 0.54   | Carbohydrate  | Fructose, mannose, galactose, starch, and sucrose metabolism | GC-MS     | 1849.2 | 319.1 | 608-66-2;    | 11850           | <a href="#">C01697</a> |

## Supplemental Data for:

Richter, C.L., A.D. Kennedy, L. Guo, and N. Dokoozlian

Metabolomic measurements at three time points of a Chardonnay wine fermentation with *Saccharomyces cerevisiae*.

Am. J. Enol. Vitic. 66:294-301. doi: 10.5344/ajev.2015.14062.

**Supplemental Table 1** The complete yeast endo-metabolome identified in this study. Compound names are reported, as well as their CAS, PUBCHEM, and KEGG identifiers. The biological pathway to which the compound belongs, the method of identification, the retention index (RI), and size of the metabolite are also listed. Normalized concentrations of each compound are shown at the three time points. Data for each compound were rescaled to a median equal to 1.

| Compound                                                                                       | Concentration |       |        | Super pathway | Subpathway                                                   | Platform  | RI     | Mass   | Identifier              |         |                        |
|------------------------------------------------------------------------------------------------|---------------|-------|--------|---------------|--------------------------------------------------------------|-----------|--------|--------|-------------------------|---------|------------------------|
|                                                                                                | Day 4         | Day 9 | Day 15 |               |                                                              |           |        |        | CAS                     | PUBCHEM | KEGG                   |
| Galactose                                                                                      | 0.63          | 1.00  | 1.67   | Carbohydrate  | Fructose, mannose, galactose, starch, and sucrose metabolism | GC-MS     | 1793.8 | 203.9  | 59-23-4;                | 3037556 | <a href="#">C01582</a> |
| Glucose                                                                                        | 0.07          | 6.70  | 0.59   | Carbohydrate  | Glycolysis, gluconeogenesis, pyruvate metabolism             | GC-MS     | 1866.8 | 217.1  | 50-99-7;                | 79025   | <a href="#">C00293</a> |
| Glucose 1-phosphate                                                                            | 0.03          | 1.23  | 0.03   | Carbohydrate  | Glycolysis, gluconeogenesis, pyruvate metabolism             | GC-MS     | 2017   | 299.1  | 56401-20-8;             | 65533   | <a href="#">C00103</a> |
| Glucose 6-phosphate                                                                            | 0.07          | 2.40  | 0.00   | Carbohydrate  | Glycolysis, gluconeogenesis, pyruvate metabolism             | GC-MS     | 2042.7 | 387.2  | 103192-55-8;            |         | <a href="#">C00668</a> |
| Glycerate                                                                                      | 0.79          | 1.95  | 0.98   | Carbohydrate  | Glycolysis, gluconeogenesis, pyruvate metabolism             | GC-MS     | 1360.7 | 189    | 600-19-1;               | 752     | <a href="#">C00258</a> |
| Isobar: fructose 1,6-diphosphate, glucose 1,6-diphosphate, myo-inositol 1,4 or 1,3-diphosphate | 0.29          | 13.81 | 0.19   | Carbohydrate  | Glycolysis, gluconeogenesis, pyruvate metabolism             | LC-MS Neg | 572    | 339    |                         |         |                        |
| Isobar: ribulose 5-phosphate, Xylulose 5-phosphate                                             | 0.08          | 1.31  | 0.04   | Carbohydrate  | Nucleotide sugars, pentose metabolism                        | GC-MS     | 1935   | 357.2  |                         |         |                        |
| Isomaltose                                                                                     | 0.74          | 1.08  | 0.75   | Carbohydrate  | Fructose, mannose, galactose, starch, and sucrose metabolism | GC-MS     | 2221.8 | 204.1  | 499-40-1;               | 439193  | <a href="#">C00252</a> |
| Lactate                                                                                        | 0.34          | 1.19  | 0.71   | Carbohydrate  | Glycolysis, gluconeogenesis, pyruvate metabolism             | GC-MS     | 1102.8 | 116.9  | 79-33-4;                | 612     | <a href="#">C00186</a> |
| Mannitol                                                                                       | 0.99          | 4.47  | 0.36   | Carbohydrate  | Fructose, mannose, galactose, starch, and sucrose metabolism | GC-MS     | 1839   | 319.1  | 69-65-8;                | 6251    | <a href="#">C00392</a> |
| Mannose                                                                                        | 0.80          | 1.87  | 0.92   | Carbohydrate  | Fructose, mannose, galactose, starch, and sucrose metabolism | GC-MS     | 1753.5 | 203.9  | 3458-28-4;              | 161658  | <a href="#">C00159</a> |
| Mannose 6-phosphate                                                                            | 0.64          | 2.98  | 0.06   | Carbohydrate  | Fructose, mannose, galactose, starch, and sucrose metabolism | GC-MS     | 2035.9 | 387.2  | 70442-25-0;104872-94-8; |         | <a href="#">C00275</a> |
| N-Acetylglucosamine                                                                            | 0.85          | 0.84  | 1.09   | Carbohydrate  | Amino-sugar metabolism                                       | GC-MS     | 1903.3 | 245    | 7512-17-6;              | 24139   | <a href="#">C00140</a> |
| Pyruvate                                                                                       | 1.21          | 0.64  | 0.69   | Carbohydrate  | Glycolysis, gluconeogenesis, pyruvate metabolism             | GC-MS     | 1130.6 | 217    | 127-17-3;               | 107735  | <a href="#">C00022</a> |
| Rhamnose                                                                                       | 0.75          | 0.96  | 1.14   | Carbohydrate  | Fructose, mannose, galactose, starch, and sucrose metabolism | GC-MS     | 1669.4 | 204    | 10030-85-0;             | 19233   | <a href="#">C00507</a> |
| Ribitol                                                                                        | 1.02          | 0.66  | 0.10   | Carbohydrate  | Nucleotide sugars, pentose metabolism                        | GC-MS     | 1692.4 | 217    | 488-81-3;               |         | <a href="#">C00474</a> |
| Ribose                                                                                         | 0.08          | 1.09  | 0.99   | Carbohydrate  | Nucleotide sugars, pentose metabolism                        | GC-MS     | 1639.2 | 204    | 50-69-1;                | 5311110 | <a href="#">C00121</a> |
| Ribulose                                                                                       | 0.39          | 1.71  | 0.52   | Carbohydrate  | Nucleotide sugars, pentose metabolism                        | GC-MS     | 1662   | 306.1  | 488-84-6;               | 79021   | <a href="#">C00309</a> |
| Sedoheptulose-7-phosphate                                                                      | 0.32          | 2.69  | 0.26   | Carbohydrate  | Nucleotide sugars, pentose metabolism                        | GC-MS     | 2070   | 691.35 | 2646-35-7;              | 616     | <a href="#">C05382</a> |

## Supplemental Data for:

Richter, C.L., A.D. Kennedy, L. Guo, and N. Dokoozlian

Metabolomic measurements at three time points of a Chardonnay wine fermentation with *Saccharomyces cerevisiae*.

Am. J. Enol. Vitic. 66:294-301. doi: 10.5344/ajev.2015.14062.

**Supplemental Table 1** The complete yeast endo-metabolome identified in this study. Compound names are reported, as well as their CAS, PUBCHEM, and KEGG identifiers. The biological pathway to which the compound belongs, the method of identification, the retention index (RI), and size of the metabolite are also listed. Normalized concentrations of each compound are shown at the three time points. Data for each compound were rescaled to a median equal to 1.

| Compound                                  | Concentration |       |        | Super pathway          | Subpathway                                                   | Platform  | RI     | Mass  | Identifier           |               |                               |
|-------------------------------------------|---------------|-------|--------|------------------------|--------------------------------------------------------------|-----------|--------|-------|----------------------|---------------|-------------------------------|
|                                           | Day 4         | Day 9 | Day 15 |                        |                                                              |           |        |       | CAS                  | PUBCHEM       | KEGG                          |
| Sorbitol                                  | 0.77          | 1.05  | 0.46   | Carbohydrate           | Fructose, mannose, galactose, starch, and sucrose metabolism | GC-MS     | 1843   | 319.1 | 6706-59-8;           | 107428        | <a href="#">C00794</a>        |
| Threitol                                  | 1.07          | 0.90  | 0.73   | Carbohydrate           | Nucleotide sugars, pentose metabolism                        | GC-MS     | 1513   | 217.1 | 2418-52-2;           | 169019        | <a href="#">C16884</a>        |
| Trehalose                                 | 0.96          | 1.37  | 0.09   | Carbohydrate           | Fructose, mannose, galactose, starch, and sucrose metabolism | GC-MS     | 2174.9 | 361.2 | 6138-23-4;           | 7427          | <a href="#">C01083</a>        |
| UDP-glucose                               | 0.70          | 0.53  | 0.53   | Carbohydrate           | Nucleotide sugars, pentose metabolism                        | GC-MS     | 1986   | 243.1 | 117756-22-6;         | 8629          | <a href="#">C00029</a>        |
| Xylitol                                   | 0.67          | 0.71  | 0.37   | Carbohydrate           | Nucleotide sugars, pentose metabolism                        | GC-MS     | 1677.6 | 307.2 | 87-99-0;             | 6912          | <a href="#">C00379</a>        |
| Xylonate                                  | 1.12          | 0.88  | 0.57   | Carbohydrate           | Nucleotide sugars, pentose metabolism                        | GC-MS     | 1722   | 292   | 73686-31-7;          | 6602431       | <a href="#">C00502,C05411</a> |
| Xylulose                                  | 0.60          | 1.44  | 0.43   | Carbohydrate           | Nucleotide sugars, pentose metabolism                        | GC-MS     | 1668   | 306.1 | 551-84-8;            | 5289590       | <a href="#">C00310</a>        |
| 2,3-Dihydroxyisovalerate                  | 0.64          | 0.86  | 0.88   | Cofactors and vitamins | Pantothenate and CoA metabolism                              | GC-MS     | 1422   | 131   | 1756-18-9;           | 677           | <a href="#">C04039</a>        |
| 3'-Dephosphocoenzyme A                    | 0.37          | 1.28  | 0.12   | Cofactors and vitamins | Pantothenate and CoA metabolism                              | LC-MS Neg | 2010   | 686.2 | 3633-59-8;           | 444485        | <a href="#">C00882</a>        |
| 5-Aminolevulinate                         | 0.68          | 1.08  | 0.74   | Cofactors and vitamins | Hemoglobin and porphyrin metabolism                          | LC-MS Pos | 711    | 132   | 5451-09-2;           | 1,377,048,523 | <a href="#">C00430</a>        |
| Acetyl CoA                                | 0.50          | 1.11  | 0.48   | Cofactors and vitamins | Pantothenate and CoA metabolism                              | LC-MS Neg | 1900   | 808.1 | 102029-73-2;         | 444493        | <a href="#">C00024</a>        |
| Adenosine 5'-diphosphoribose (ADP-Ribose) | 0.41          | 1.74  | 1.50   | Cofactors and vitamins | Nicotinate and nicotinamide metabolism                       | LC-MS Neg | 964    | 558.1 | 68414-18-6;          | 4475880       | <a href="#">C00301</a>        |
| Ascorbate (vitamin C)                     | 0.98          | 0.05  | 0.05   | Cofactors and vitamins | Ascorbate and aldarate metabolism                            | GC-MS     | 1850.1 | 332.1 | 134-03-2;            |               | <a href="#">C00072</a>        |
| CoA                                       | 0.66          | 1.74  | 0.58   | Cofactors and vitamins | Pantothenate and CoA metabolism                              | LC-MS Neg | 1600   | 766.1 | 85-61-0;18439-24-2;  | 317           | <a href="#">C00010</a>        |
| Coproporphyrin III                        | 0.70          | 1.09  | 4.39   | Cofactors and vitamins | Hemoglobin and porphyrin metabolism                          | LC-MS Pos | 5143.1 | 655.4 | 14643-66-4;          |               | <a href="#">C05770</a>        |
| FAD                                       | 3.35          | 1.00  | 0.57   | Cofactors and vitamins | Riboflavin metabolism                                        | LC-MS Neg | 2413   | 784.1 | 146-14-5;84366-81-4; | 643975        | <a href="#">C00016</a>        |
| FMN                                       | 4.24          | 0.87  | 0.57   | Cofactors and vitamins | Riboflavin metabolism                                        | LC-MS Neg | 2395   | 455.1 | 130-40-5;            | 710           | <a href="#">C00061</a>        |
| Nicotinamide                              | 1.34          | 0.60  | 1.31   | Cofactors and vitamins | Nicotinate and nicotinamide metabolism                       | LC-MS Pos | 1267   | 123.1 | 98-92-0;             | 936           | <a href="#">C00153</a>        |
| NAD <sup>+</sup>                          | 1.79          | 0.57  | 0.20   | Cofactors and vitamins | Nicotinate and nicotinamide metabolism                       | LC-MS Pos | 1370   | 664   | 53-84-9;             | 5893          | <a href="#">C00003</a>        |
| NADH                                      | 4.42          | 0.17  | 0.17   | Cofactors and vitamins | Nicotinate and nicotinamide metabolism                       | LC-MS Neg | 1554   | 664.1 | 58-68-4;606-68-8;    | 439153        | <a href="#">C00004</a>        |
| Nicotinamide ribonucleotide (NMN)         | 1.67          | 0.95  | 0.29   | Cofactors and vitamins | Nicotinate and nicotinamide metabolism                       | LC-MS Pos | 886    | 335.1 | 1094-61-7;           | 14180         | <a href="#">C00455</a>        |

## Supplemental Data for:

Richter, C.L., A.D. Kennedy, L. Guo, and N. Dokoozlian

Metabolomic measurements at three time points of a Chardonnay wine fermentation with *Saccharomyces cerevisiae*.

Am. J. Enol. Vitic. 66:294-301. doi: 10.5344/ajev.2015.14062.

**Supplemental Table 1** The complete yeast endo-metabolome identified in this study. Compound names are reported, as well as their CAS, PUBCHEM, and KEGG identifiers. The biological pathway to which the compound belongs, the method of identification, the retention index (RI), and size of the metabolite are also listed. Normalized concentrations of each compound are shown at the three time points. Data for each compound were rescaled to a median equal to 1.

| Compound                   | Concentration |       |        | Super pathway          | Subpathway                             | Platform  | RI     | Mass  | Identifier                    |          |                                                    |
|----------------------------|---------------|-------|--------|------------------------|----------------------------------------|-----------|--------|-------|-------------------------------|----------|----------------------------------------------------|
|                            | Day 4         | Day 9 | Day 15 |                        |                                        |           |        |       | CAS                           | PUBCHEM  | KEGG                                               |
| Nicotinamide riboside      | 0.18          | 2.78  | 0.03   | Cofactors and vitamins | Nicotinate and nicotinamide metabolism | LC-MS Pos | 955    | 255.1 | 1341-23-7;                    |          |                                                    |
| Nicotinate ribonucleoside  | 0.56          | 0.51  | 0.93   | Cofactors and vitamins | Nicotinate and nicotinamide metabolism | LC-MS Pos | 1105   | 256   | 2625-49-2;                    | 161233   |                                                    |
| Pantothenate (vitamin B5)  | 1.01          | 0.52  | 0.40   | Cofactors and vitamins | Pantothenate and coa metabolism        | LC-MS Pos | 2218   | 220.1 | 137-08-6;                     | 6613     | <a href="#">C00864</a>                             |
| Phosphopantetheine         | 11.08         | 0.57  | 0.41   | Cofactors and vitamins | Pantothenate and coa metabolism        | LC-MS Neg | 1624   | 357.2 | NA;                           | 115254   | <a href="#">C01134</a>                             |
| Pyridoxal                  | 1.77          | 0.72  | 0.91   | Cofactors and vitamins | Pyridoxal metabolism                   | LC-MS Pos | 1210   | 168.1 | 65-22-5;                      | 1050     | <a href="#">C00250</a>                             |
| Pyridoxine (vitamin B6)    | 10.10         | 0.82  | 1.27   | Cofactors and vitamins | Vitamin B6 metabolism                  | LC-MS Pos | 1386   | 170.1 | 58-56-0;                      | 1054     | <a href="#">C00314</a>                             |
| Riboflavin (vitamin B2)    | 1.03          | 1.06  | 0.82   | Cofactors and vitamins | Riboflavin metabolism                  | LC-MS Pos | 3111   | 377.2 | 83-88-5;                      | 493570   | <a href="#">C00255</a>                             |
| Thiamin (vitamin B1)       | 1.05          | 1.49  | 0.44   | Cofactors and vitamins | Thiamine metabolism                    | LC-MS Neg | 1699   | 263.1 | 59-43-8;                      |          |                                                    |
| Threonate                  | 1.06          | 0.79  | 1.01   | Cofactors and vitamins | Ascorbate and aldarate metabolism      | GC-MS     | 1560.7 | 292.1 | 70753-61-6;                   | 151152   | <a href="#">C01620</a>                             |
| Acetylphosphate            | 1.55          | 0.96  | 0.15   | Energy                 | Oxidative phosphorylation              | GC-MS     | 1263   | 211   | 94249-01-1;                   | 186      | <a href="#">C00227</a>                             |
| a-Ketoglutarate            | 0.21          | 1.27  | 8.60   | Energy                 | Krebs cycle                            | GC-MS     | 1779   | 419.1 | 305-72-6;328-50-7;22202-68-2; | 51       | <a href="#">C00026</a>                             |
| <i>cis</i> -Aconitate      | 0.08          | 1.84  | 0.14   | Energy                 | Krebs cycle                            | LC-MS Neg | 603    | 173.1 | 585-84-2;                     | 643757   | <a href="#">C00417</a>                             |
| Citrate                    | 0.14          | 1.61  | 0.95   | Energy                 | Krebs cycle                            | GC-MS     | 1763.4 | 273.1 | 77-92-9;                      | 311      | <a href="#">C00158</a>                             |
| Fumarate                   | 0.92          | 0.94  | 0.16   | Energy                 | Krebs cycle                            | GC-MS     | 1382.1 | 245   | 100-17-8;                     |          | <a href="#">C00122</a>                             |
| Homocitrate                | 4.67          | 0.99  | 0.17   | Energy                 | Krebs cycle                            | LC-MS Neg | 568.8  | 205.1 | 3562-74-1;                    | 439459   | <a href="#">C01251</a>                             |
| Isocitrate                 | 0.07          | 0.92  | 1.06   | Energy                 | Krebs cycle                            | LC-MS Pos | 953    | 210   | 20226-99-7;                   | 1198     | <a href="#">C00311</a>                             |
| Malate                     | 0.46          | 1.12  | 1.25   | Energy                 | Krebs cycle                            | GC-MS     | 1502   | 233   | 6915-15-7;                    | 525      | <a href="#">C00149</a>                             |
| Phosphate                  | 1.89          | 1.04  | 0.17   | Energy                 | Oxidative phosphorylation              | GC-MS     | 1307.7 | 298.9 | 7664-38-2;                    | 1061     | <a href="#">C00009</a>                             |
| Succinate                  | 0.98          | 0.86  | 0.56   | Energy                 | Krebs cycle                            | LC-MS Neg | 618    | 117.1 | 110-15-6;                     | 1110     | <a href="#">C00042</a>                             |
| 1,2-Propanediol            | 0.84          | 0.60  | 0.28   | Lipid                  | Ketone bodies                          | GC-MS     | 1041   | 117   | 57-55-6;                      |          | <a href="#">C00717,C02912,C00583,C01506,C02917</a> |
| 1-Oleoyl-GPC (18:1)        | 1.14          | 0.20  | 0.20   | Lipid                  | Lysolipid                              | LC-MS Pos | 5700   | 522.4 | 19420-56-5;                   | 16081932 |                                                    |
| 1-Palmitoleoyl-GPC (16:1)  | 1.57          | 0.05  | 0.04   | Lipid                  | Lysolipid                              | LC-MS Pos | 5524   | 494.3 |                               |          |                                                    |
| 1-Palmitoylglycerol (16:0) | 2.64          | 1.06  | 0.44   | Lipid                  | Monoacylglycerol                       | GC-MS     | 2119.5 | 371.3 | 542-44-9;                     | 14900    |                                                    |
| 1-Palmitoyl-GPC (16:0)     | 16.22         | 0.49  | 0.15   | Lipid                  | Lysolipid                              | LC-MS Pos | 5671   | 496.4 | 17364-16-8;                   | 86554    |                                                    |
| 1-Palmitoyl-GPE (16:0)     | 7.14          | 0.54  | 0.45   | Lipid                  | Lysolipid                              | LC-MS Pos | 5635   | 454.2 |                               | 9547069  |                                                    |
| 1-Palmitoyl-GPI (16:0)     | 9.70          | 1.48  | 0.54   | Lipid                  | Lysolipid                              | LC-MS Neg | 5573   | 571.3 |                               |          |                                                    |
| 1-Stearoylglycerol (18:0)  | 1.66          | 1.08  | 0.44   | Lipid                  | Monoacylglycerol                       | GC-MS     | 2186.6 | 399.4 | 123-94-4;                     | 24699    | <a href="#">D01947</a>                             |
| 1-Stearoyl-GPC (18:0)      | 5.92          | 0.53  | 0.22   | Lipid                  | Lysolipid                              | LC-MS Pos | 5844   | 524.4 | 19420-57-6;                   | 497299   |                                                    |
| 1-Stearoyl-GPI (18:0)      | 5.08          | 1.53  | 0.18   | Lipid                  | Lysolipid                              | LC-MS Neg | 5800   | 599.4 |                               |          |                                                    |
| 13-HODE + 9-HODE           | 1.02          | 1.05  | 0.27   | Lipid                  | Fatty acid, monohydroxy                | LC-MS Neg | 5247   | 295.2 |                               |          |                                                    |

## Supplemental Data for:

Richter, C.L., A.D. Kennedy, L. Guo, and N. Dokoozlian

Metabolomic measurements at three time points of a Chardonnay wine fermentation with *Saccharomyces cerevisiae*.

Am. J. Enol. Vitic. 66:294-301. doi: 10.5344/ajev.2015.14062.

**Supplemental Table 1** The complete yeast endo-metabolome identified in this study. Compound names are reported, as well as their CAS, PUBCHEM, and KEGG identifiers. The biological pathway to which the compound belongs, the method of identification, the retention index (RI), and size of the metabolite are also listed. Normalized concentrations of each compound are shown at the three time points. Data for each compound were rescaled to a median equal to 1.

| Compound                         | Concentration |       |        | Super pathway | Subpathway                | Platform  | RI     | Mass   | Identifier  |          |                        |
|----------------------------------|---------------|-------|--------|---------------|---------------------------|-----------|--------|--------|-------------|----------|------------------------|
|                                  | Day 4         | Day 9 | Day 15 |               |                           |           |        |        | CAS         | PUBCHEM  | KEGG                   |
| 2-Hydroxyglutarate               | 0.40          | 1.08  | 1.05   | Lipid         | Fatty acid, dicarboxylate | GC-MS     | 1576   | 247    | 40951-21-1; | 43       | <a href="#">C02630</a> |
| 2-Hydroxyoctanoate               | 3.68          | 0.88  | 0.18   | Lipid         | Fatty acid, monohydroxy   | GC-MS     | 1473.6 | 187    | 617-73-2;   | 94180    |                        |
| 2-Hydroxypalmitate               | 0.57          | 0.76  | 0.29   | Lipid         | Fatty acid, monohydroxy   | LC-MS Neg | 5508   | 271.3  | 764-67-0;   | 92836    |                        |
| 2-Hydroxystearate                | 1.54          | 0.84  | 0.33   | Lipid         | Fatty acid, monohydroxy   | LC-MS Neg | 5705   | 299.4  | 629-22-1;   | 69417    | <a href="#">C03045</a> |
| 2-Oleoyl-GPC (18:1)              | 4.46          | 0.46  | 0.46   | Lipid         | Lysolipid                 | LC-MS Pos | 5640   | 522.4  |             |          |                        |
| 2-Oleoyl-GPE (18:1)              | 0.82          | 0.63  | 0.63   | Lipid         | Lysolipid                 | LC-MS Pos | 5625   | 480.2  |             |          |                        |
| 2-Palmitoleoyl-GPC (16:1)        | 1.53          | 0.05  | 0.05   | Lipid         | Lysolipid                 | LC-MS Pos | 5482   | 494.3  |             |          |                        |
| 2-Palmitoleoyl-GPE (16:1)        | 1.29          | 0.75  | 0.64   | Lipid         | Lysolipid                 | LC-MS Neg | 5611   | 450.3  |             |          |                        |
| 2-Palmitoyl-GPC (16:0)           | 1.32          | 0.20  | 0.20   | Lipid         | Lysolipid                 | LC-MS Pos | 5604   | 496.3  |             |          |                        |
| 2-Palmitoyl-GPE (16:0)           | 2.07          | 0.63  | 0.29   | Lipid         | Lysolipid                 | LC-MS Neg | 5790   | 452.3  |             |          |                        |
| 2-Stearoyl-GPC (18:0)            | 1.47          | 0.53  | 0.53   | Lipid         | Lysolipid                 | LC-MS Pos | 5780   | 524.4  |             | 10208382 |                        |
| 2-Stearoylglycerophosphoinositol | 2.22          | 0.65  | 0.15   | Lipid         | Lysolipid                 | LC-MS Neg | 5751.6 | 599.4  |             |          |                        |
| 3-Hydroxy-3-methylglutarate      | 1.00          | 0.53  | 0.37   | Lipid         | Mevalonate metabolism     | GC-MS     | 1598.2 | 247    | 503-49-1;   | 5459993  | <a href="#">C03761</a> |
| 3-Hydroxydecanoate               | 0.94          | 0.90  | 0.49   | Lipid         | Fatty acid, monohydroxy   | LC-MS Neg | 4681   | 187.2  | 5561-87-5;  | 26612    |                        |
| 3-Ketosphinganine                | 0.72          | 0.84  | 2.52   | Lipid         | Sphingolipid              | LC-MS Pos | 5218   | 300.4  | 18944-28-0; | 631      | <a href="#">C02934</a> |
| 4-Hydroxybutyrate (GHB)          | 0.68          | 0.99  | 0.11   | Lipid         | Fatty acid, monohydroxy   | GC-MS     | 1277   | 233.1  | 502-85-2;   | 10413    | <a href="#">C00989</a> |
| Acetylcarnitine (C2)             | 1.05          | 0.50  | 0.20   | Lipid         | Carnitine metabolism      | LC-MS Pos | 1203   | 204.2  | 5080-50-2;  | 7045767  | <a href="#">C02571</a> |
| Acetylcholine                    | 0.40          | 4.25  | 1.77   | Lipid         | Neurotransmitter          | LC-MS Pos | 866    | 146.1  | 60-32-1;    | 187      | <a href="#">C01996</a> |
| Arachidonate (20:4n6)            | 1.71          | 0.92  | 0.83   | Lipid         | Long-chain fatty acid     | LC-MS Neg | 5525   | 303.4  | 506-32-1;   | 444899   | <a href="#">C00219</a> |
| Azelaate (nonanedioate; C9)      | 1.06          | 1.29  | 0.32   | Lipid         | Fatty acid, dicarboxylate | LC-MS Neg | 1322   | 187.2  | 123-99-9;   | 2266     | <a href="#">C08261</a> |
| b-Sitosterol                     | 2.02          | 1.27  | 1.08   | Lipid         | Sterol-steroid            | GC-MS     | 2380.8 | 357.4  | 83-46-5;    | 222284   | <a href="#">C01753</a> |
| Caprate (10:0)                   | 1.80          | 2.13  | 0.24   | Lipid         | Medium-chain fatty acid   | LC-MS Neg | 5092   | 171.2  | 112-37-8;   | 2969     | <a href="#">C01571</a> |
| Caproate (6:0)                   | 4.59          | 1.45  | 0.14   | Lipid         | Medium-chain fatty acid   | LC-MS Neg | 2766   | 115.2  | 142-62-1;   | 8892     | <a href="#">C01585</a> |
| Caprylate (8:0)                  | 2.07          | 1.30  | 0.33   | Lipid         | Medium-chain fatty acid   | LC-MS Neg | 4367   | 143.2  | 124-07-2;   | 379      | <a href="#">C06423</a> |
| Carnitine                        | 1.05          | 0.99  | 0.52   | Lipid         | Carnitine metabolism      | LC-MS Pos | 702    | 162.2  | 461-05-2;   | 10917    |                        |
| Cholate                          | 0.73          | 2.19  | 4.28   | Lipid         | Bile acid metabolism      | LC-MS Neg | 5148   | 407.4  | 81-25-4;    |          | <a href="#">C00695</a> |
| Vaccenate (18:1n7)               | 1.24          | 1.24  | 1.96   | Lipid         | Long-chain fatty acid     | GC-MS     | 1987   | 339.3  | 693-72-1;   | 5282761  | <a href="#">C08367</a> |
| Deoxycarnitine                   | 1.07          | 0.61  | 0.40   | Lipid         | Carnitine metabolism      | LC-MS Pos | 759    | 146.1  | 6249-56-5;  | 725      | <a href="#">C01181</a> |
| Deoxycholate                     | 0.79          | 1.62  | 1.36   | Lipid         | Bile acid metabolism      | LC-MS Neg | 5268   | 391.4  | 83-44-3;    | 440355   | <a href="#">C04483</a> |
| Ergosterol                       | 3.91          | 0.61  | 1.23   | Lipid         | Sterol-steroid            | GC-MS     | 2346.1 | 363.3  | 57-87-4;    | 444679   | <a href="#">C01694</a> |
| Ethanolamine                     | 1.49          | 1.01  | 0.50   | Lipid         | Glycerolipid metabolism   | GC-MS     | 1074   | 102    | 141-43-5;   |          | <a href="#">C00189</a> |
| Ethylpalmitate                   | 0.27          | 1.86  | 2.29   | Lipid         | Fatty acid, ester         | GC-MS     | 1882   | 101.04 | 628-97-7;   | 12366    |                        |
| Ethyl stearate                   | 0.05          | 1.05  | 2.35   | Lipid         | Fatty acid, ester         | GC-MS     | 1977   | 101.04 | 111-61-5;   | 8122     |                        |
| Glycerol                         | 2.02          | 0.63  | 0.43   | Lipid         | Glycerolipid metabolism   | GC-MS     | 1311   | 205    | 56-81-5;    | 753      | <a href="#">C00116</a> |



## Supplemental Data for:

Richter, C.L., A.D. Kennedy, L. Guo, and N. Dokoozlian

Metabolomic measurements at three time points of a Chardonnay wine fermentation with *Saccharomyces cerevisiae*.

Am. J. Enol. Vitic. 66:294-301. doi: 10.5344/ajev.2015.14062.

**Supplemental Table 1** The complete yeast endo-metabolome identified in this study. Compound names are reported, as well as their CAS, PUBCHEM, and KEGG identifiers. The biological pathway to which the compound belongs, the method of identification, the retention index (RI), and size of the metabolite are also listed. Normalized concentrations of each compound are shown at the three time points. Data for each compound were rescaled to a median equal to 1.

| Compound                        | Concentration |       |        | Super pathway | Subpathway                               | Platform  | RI     | Mass  | Identifier         |         |                        |
|---------------------------------|---------------|-------|--------|---------------|------------------------------------------|-----------|--------|-------|--------------------|---------|------------------------|
|                                 | Day 4         | Day 9 | Day 15 |               |                                          |           |        |       | CAS                | PUBCHEM | KEGG                   |
| Glycerol 3-phosphate (G3P)      | 1.34          | 0.73  | 0.09   | Lipid         | Glycerolipid metabolism                  | GC-MS     | 1719.7 | 357.1 | 29849-82-9;        | 754     | <a href="#">C00093</a> |
| Glycerophosphoethanolamine      | 1.81          | 1.33  | 0.08   | Lipid         | Glycerolipid metabolism                  | GC-MS     | 1906   | 357.1 | 33049-08-0;        | 123874  | <a href="#">C01233</a> |
| Glycerophosphorylcholine (GPC)  | 1.00          | 0.90  | 0.30   | Lipid         | Glycerolipid metabolism                  | LC-MS Pos | 694    | 258.1 | 28319-77-9;        | 657272  | <a href="#">C00670</a> |
| Glycocholate                    | 0.52          | 1.43  | 3.02   | Lipid         | Bile acid metabolism                     | LC-MS Neg | 5104   | 464.4 | 475-31-0;863-57-0; | 10140   | <a href="#">C01921</a> |
| Inositol 1-phosphate (I1P)      | 1.16          | 2.89  | 0.20   | Lipid         | Inositol metabolism                      | GC-MS     | 2057.8 | 318.1 | 106032-59-1;       |         |                        |
| Lanosterol                      | 2.74          | 1.48  | 2.41   | Lipid         | Sterol-steroid                           | GC-MS     | 2388   | 393.3 | 79-63-0;           | 246983  | <a href="#">C01724</a> |
| Laurate (12:0)                  | 1.72          | 1.89  | 0.11   | Lipid         | Medium-chain fatty acid                  | LC-MS Neg | 5288   | 199.3 | 143-07-7;          | 3893    | <a href="#">C02679</a> |
| Linoleate (18:2n6)              | 1.02          | 2.25  | 0.55   | Lipid         | Essential fatty acid                     | LC-MS Neg | 5533   | 279.3 | 60-33-3;           | 5280450 | <a href="#">C01595</a> |
| Linolenate (18:3n3 or 3n6)      | 0.71          | 4.13  | 0.60   | Lipid         | Essential fatty acid                     | LC-MS Neg | 5450   | 277.3 |                    |         | <a href="#">C06427</a> |
| Mevalonate*                     | 0.55          | 0.99  | 0.17   | Lipid         | Mevalonate metabolism                    | GC-MS     | 1562   | 247   | 96949-03-0;        | 439230  | <a href="#">C02104</a> |
| Mevalonolactone                 | 0.89          | 0.54  | 0.82   | Lipid         | Mevalonate metabolism                    | LC-MS Pos | 1784   | 131.1 | 674-26-0;          | 10428   |                        |
| myo-Inositol                    | 1.01          | 0.69  | 0.16   | Lipid         | Inositol metabolism                      | GC-MS     | 1924.9 | 217   | 87-89-8;           |         | <a href="#">C00137</a> |
| Myristate (14:0)                | 2.30          | 1.70  | 0.18   | Lipid         | Long-chain fatty acid                    | LC-MS Neg | 5439   | 227.3 | 544-63-8;          | 11005   | <a href="#">C06424</a> |
| Myristoleate (14:1n5)           | 0.77          | 6.14  | 0.49   | Lipid         | Long-chain fatty acid                    | LC-MS Neg | 5338   | 225.3 | 544-64-9;          | 5281119 | <a href="#">C08322</a> |
| Oleate (18:1n9)                 | 0.91          | 2.28  | 3.23   | Lipid         | Long-chain fatty acid                    | GC-MS     | 1984.4 | 339.2 | 112-80-1;          | 445639  | <a href="#">C00712</a> |
| Palmitate (16:0)                | 0.87          | 1.71  | 0.45   | Lipid         | Long-chain fatty acid                    | LC-MS Neg | 5619   | 255.3 | 57-10-3;           | 985     | <a href="#">C00249</a> |
| Palmitoleate (16:1n7)           | 0.80          | 3.21  | 0.70   | Lipid         | Long-chain fatty acid                    | LC-MS Neg | 5477   | 253.3 | 373-49-9;          | 445638  | <a href="#">C08362</a> |
| Palmitoyl ethanolamide          | 0.86          | 0.67  | 2.24   | Lipid         | Endocannabinoid                          | LC-MS Pos | 5742   | 300.4 |                    | 4671    |                        |
| Phytosphingosine                | 1.37          | 0.14  | 0.78   | Lipid         | Sphingolipid                             | LC-MS Pos | 5189   | 318.4 | 554-62-1;          |         | <a href="#">C12144</a> |
| scyllo-Inositol                 | 0.94          | 0.80  | 0.96   | Lipid         | Inositol metabolism                      | GC-MS     | 1893.8 | 318.2 | 488-59-5;          |         | <a href="#">C06153</a> |
| Sphinganine                     | 1.15          | 0.36  | 0.79   | Lipid         | Sphingolipid                             | LC-MS Pos | 5175   | 302.3 | 3102-56-5;         | 3126    | <a href="#">C00836</a> |
| Sphingosine                     | 1.40          | 0.39  | 0.85   | Lipid         | Sphingolipid                             | LC-MS Pos | 5197   | 300.2 | 123-78-4;          | 5353955 | <a href="#">C00319</a> |
| Squalene                        | 0.97          | 0.46  | 1.02   | Lipid         | Sterol-steroid                           | GC-MS     | 2205   | 69    | 111-02-4;          | 638072  | <a href="#">C00751</a> |
| Stearate (18:0)                 | 0.88          | 1.53  | 0.52   | Lipid         | Long-chain fatty acid                    | LC-MS Neg | 5886   | 283.4 | 57-11-4;           | 5281    | <a href="#">C01530</a> |
| Taurocholate                    | 0.40          | 1.57  | 3.72   | Lipid         | Bile acid metabolism                     | LC-MS Neg | 5122   | 514.3 | 145-42-6;          |         | <a href="#">C05122</a> |
| Undecanedioate                  | 1.04          | 1.08  | 0.33   | Lipid         | Fatty acid, dicarboxylate                | LC-MS Neg | 2376   | 215.1 | 1852-04-6;         | 15816   |                        |
| 2'-Deoxyadenosine               | 1.75          | 0.43  | 0.25   | Nucleotide    | Purine metabolism, adenine containing    | LC-MS Pos | 1632   | 252.1 | 16373-93-6;        | 13730   | <a href="#">C00559</a> |
| 2'-O-Methylguanosine            | 2.64          | 0.47  | 0.44   | Nucleotide    | Purine metabolism, guanine containing    | LC-MS Neg | 1901   | 296.2 | 2140-71-8;         |         | <a href="#">C04545</a> |
| 5-Methyluridine (ribothymidine) | 0.94          | 1.14  | 1.16   | Nucleotide    | Pyrimidine metabolism, uracil containing | LC-MS Neg | 1774   | 257.1 | 1463-10-1;         | 445408  |                        |
| 7-Methylguanine                 | 2.81          | 0.26  | 0.30   | Nucleotide    | Purine metabolism, guanine containing    | GC-MS     | 1968   | 294   | 578-76-7;          | 11361   | <a href="#">C02242</a> |

## Supplemental Data for:

Richter, C.L., A.D. Kennedy, L. Guo, and N. Dokoozlian

Metabolomic measurements at three time points of a Chardonnay wine fermentation with *Saccharomyces cerevisiae*.

Am. J. Enol. Vitic. 66:294-301. doi: 10.5344/ajev.2015.14062.

**Supplemental Table 1** The complete yeast endo-metabolome identified in this study. Compound names are reported, as well as their CAS, PUBCHEM, and KEGG identifiers. The biological pathway to which the compound belongs, the method of identification, the retention index (RI), and size of the metabolite are also listed. Normalized concentrations of each compound are shown at the three time points. Data for each compound were rescaled to a median equal to 1.

| Compound                             | Concentration |       |        | Super pathway | Subpathway                                           | Platform  | RI     | Mass  | Identifier        |          |                        |
|--------------------------------------|---------------|-------|--------|---------------|------------------------------------------------------|-----------|--------|-------|-------------------|----------|------------------------|
|                                      | Day 4         | Day 9 | Day 15 |               |                                                      |           |        |       | CAS               | PUBCHEM  | KEGG                   |
| Adenine                              | 0.04          | 1.07  | 1.36   | Nucleotide    | Purine metabolism, adenine containing                | LC-MS Pos | 1003   | 136.1 | 73-24-5;          | 190      | <a href="#">C00147</a> |
| Adenosine                            | 0.14          | 2.05  | 0.34   | Nucleotide    | Purine metabolism, adenine containing                | LC-MS Pos | 1650   | 268.1 | 58-61-7;          | 60961    | <a href="#">C00212</a> |
| 3'-AMP                               | 0.51          | 5.51  | 0.56   | Nucleotide    | Purine metabolism, adenine containing                | LC-MS Neg | 1268   | 346.1 | 84-21-9;          | 15938966 | <a href="#">C01367</a> |
| Amp                                  | 1.37          | 0.86  | 0.01   | Nucleotide    | Purine metabolism, adenine containing                | LC-MS Pos | 1210   | 348.1 | 149022-20-8;      | 15938965 | <a href="#">C00020</a> |
| Adenylosuccinate                     | 0.98          | 1.20  | 0.08   | Nucleotide    | Purine metabolism, adenine containing                | LC-MS Neg | 569    | 462.1 | 19046-78-7;       | 195      | <a href="#">C03794</a> |
| Cytidine                             | 0.07          | 0.95  | 1.22   | Nucleotide    | Pyrimidine metabolism, cytidine containing           | LC-MS Pos | 1065   | 244   | 65-46-3;          | 6175     | <a href="#">C00475</a> |
| CMP                                  | 0.57          | 1.12  | 0.16   | Nucleotide    | Pyrimidine metabolism, cytidine containing           | LC-MS Pos | 887    | 324   | 63-37-6;          | 7058165  | <a href="#">C00055</a> |
| Guanine                              | 1.03          | 0.82  | 1.48   | Nucleotide    | Purine metabolism, guanine containing                | GC-MS     | 1942.3 | 352.1 | 73-40-5;          | 764      | <a href="#">C00242</a> |
| Guanosine                            | 0.11          | 1.73  | 0.54   | Nucleotide    | Purine metabolism, guanine containing                | LC-MS Pos | 1676   | 284   | 118-00-3;         | 6802     | <a href="#">C00387</a> |
| Guanosine-2',3'-cyclic monophosphate | 0.24          | 4.23  | 2.45   | Nucleotide    | Purine metabolism, guanine containing                | LC-MS Neg | 1454   | 343.9 |                   | 417655   | <a href="#">C06194</a> |
| Hypoxanthine                         | 6.16          | 0.76  | 0.12   | Nucleotide    | Purine metabolism, (hypo)xanthine-inosine containing | GC-MS     | 1759.2 | 265   | 68-94-0;          | 790      | <a href="#">C00262</a> |
| Inosine                              | 1.01          | 1.10  | 0.05   | Nucleotide    | Purine metabolism, (hypo)xanthine-inosine containing | LC-MS Neg | 1630   | 267.2 | 58-63-9;          |          |                        |
| Methylphosphate                      | 3.35          | 0.86  | 0.45   | Nucleotide    | Purine and pyrimidine metabolism                     | GC-MS     | 1221   | 240.9 | 7023-27-0;        | 13130    |                        |
| Pseudouridine                        | 4.09          | 0.60  | 0.23   | Nucleotide    | Pyrimidine metabolism, uracil containing             | LC-MS Neg | 1104   | 243.1 | 1445-07-4;        |          | <a href="#">C02067</a> |
| Thymidine                            | 3.43          | 0.45  | 0.38   | Nucleotide    | Pyrimidine metabolism, thymine containing            | LC-MS Pos | 1976   | 242.9 | 50-89-5;          | 5789     | <a href="#">C00214</a> |
| Uracil                               | 17.43         | 0.18  | 0.10   | Nucleotide    | Pyrimidine metabolism, uracil containing             | GC-MS     | 1370.4 | 241   | 66-22-8;          | 1174     | <a href="#">C00106</a> |
| Urate                                | 0.84          | 1.03  | 1.37   | Nucleotide    | Purine metabolism, urate metabolism                  | GC-MS     | 1928   | 441.2 | 69-93-2;120K5305; |          | <a href="#">C00366</a> |
| Uridine                              | 0.21          | 1.41  | 0.63   | Nucleotide    | Pyrimidine metabolism, uracil containing             | LC-MS Neg | 1467   | 243.1 | 58-96-8;          | 6029     | <a href="#">C00299</a> |
| Uridine monophosphate (5' or 3')     | 0.67          | 1.65  | 0.12   | Nucleotide    | Pyrimidine metabolism, uracil containing             | LC-MS Pos | 1079   | 325   |                   |          |                        |

## Supplemental Data for:

Richter, C.L., A.D. Kennedy, L. Guo, and N. Dokoozlian

Metabolomic measurements at three time points of a Chardonnay wine fermentation with *Saccharomyces cerevisiae*.

Am. J. Enol. Vitic. 66:294-301. doi: 10.5344/ajev.2015.14062.

**Supplemental Table 1** The complete yeast endo-metabolome identified in this study. Compound names are reported, as well as their CAS, PUBCHEM, and KEGG identifiers. The biological pathway to which the compound belongs, the method of identification, the retention index (RI), and size of the metabolite are also listed. Normalized concentrations of each compound are shown at the three time points. Data for each compound were rescaled to a median equal to 1.

| Compound                   | Concentration |       |        | Super pathway | Subpathway                                           | Platform  | RI     | Mass  | Identifier  |                    |                        |
|----------------------------|---------------|-------|--------|---------------|------------------------------------------------------|-----------|--------|-------|-------------|--------------------|------------------------|
|                            | Day 4         | Day 9 | Day 15 |               |                                                      |           |        |       | CAS         | PUBCHEM            | KEGG                   |
| Xanthine                   | 16.56         | 0.46  | 0.39   | Nucleotide    | Purine metabolism, (hypo)xanthine/inosine containing | GC-MS     | 1889.9 | 353   | 69-89-6;    | 1188               | <a href="#">C00385</a> |
| Alanylleucine              | 0.80          | 3.14  | 0.85   | Peptide       | Dipeptide                                            | LC-MS Pos | 2150   | 203   |             | 259583             |                        |
| Aspartylleucine            | 0.71          | 3.01  | 0.90   | Peptide       | Dipeptide                                            | LC-MS Pos | 2310   | 247.2 | 3062-14-4;  | 332962             |                        |
| Aspartylphenylalanine      | 1.04          | 1.53  | 0.85   | Peptide       | Dipeptide                                            | LC-MS Pos | 2538   | 281.1 | 13433-09-5; | 93078              |                        |
| g-Glutamyl-2-aminobutyrate | 11.14         | 0.87  | 0.24   | Peptide       | Gamma-glutamyl                                       | LC-MS Pos | 1589   | 233.1 |             |                    |                        |
| g-Glutamylcysteine         | 2.40          | 1.08  | 0.09   | Peptide       | Gamma-glutamyl                                       | LC-MS Pos | 1274   | 251.1 | 636-58-8;   | 842                | <a href="#">C00669</a> |
| g-Glutamylglycine          | 1.55          | 0.81  | 0.09   | Peptide       | Gamma-glutamyl                                       | GC-MS     | 1934   | 375.2 | 1948-29-4;  | 165527             |                        |
| g-Glutamylisoleucine       | 1.08          | 0.41  | 0.55   | Peptide       | Gamma-glutamyl                                       | LC-MS Pos | 2644   | 261.2 |             |                    |                        |
| g-Glutamylleucine          | 2.88          | 0.50  | 0.51   | Peptide       | Gamma-glutamyl                                       | LC-MS Pos | 2744   | 261.2 | 2566-39-4;  | 151023             |                        |
| g-Glutamylphenylalanine    | 1.39          | 0.72  | 1.10   | Peptide       | Gamma-glutamyl                                       | LC-MS Pos | 2846   | 295.1 | 7432-24-8;  | 111299             |                        |
| Glycylisoleucine           | 2.32          | 0.88  | 0.43   | Peptide       | Dipeptide                                            | LC-MS Pos | 2080   | 189.1 | 19461-38-2; |                    |                        |
| Glycylleucine              | 4.16          | 1.09  | 0.23   | Peptide       | Dipeptide                                            | LC-MS Pos | 2236   | 189.1 | 869-19-2;   | 928,431,548,899    | <a href="#">C02155</a> |
| Glycylproline              | 8.82          | 0.51  | 0.28   | Peptide       | Dipeptide                                            | LC-MS Pos | 1115   | 173.1 | 704-15-4;   | 30,136,256,993,386 |                        |
| Isoleucylalanine           | 0.83          | 1.55  | 1.01   | Peptide       | Dipeptide                                            | LC-MS Pos | 1686   | 203.2 | 24787-73-3; | 52,460,095,246,010 |                        |
| Isoleucylglycine           | 2.86          | 0.72  | 0.76   | Peptide       | Dipeptide                                            | LC-MS Pos | 1732   | 189.2 | 868-28-0;   | 342532             |                        |
| Isoleucylisoleucine        | 1.06          | 1.24  | 0.41   | Peptide       | Dipeptide                                            | LC-MS Pos | 2678   | 245.1 | 42537-99-5; |                    |                        |
| Isoleucylleucine           | 0.55          | 1.39  | 1.38   | Peptide       | Dipeptide                                            | LC-MS Pos | 2856   | 245.1 | 26462-22-6; | 11644431           |                        |
| Leucylalanine              | 0.99          | 0.87  | 1.24   | Peptide       | Dipeptide                                            | LC-MS Pos | 1760   | 203.2 | 7298-84-2;  | 259321             |                        |
| Leucylglycine              | 0.70          | 0.97  | 2.03   | Peptide       | Dipeptide                                            | LC-MS Pos | 1800   | 189.2 | 686-50-0;   | 79070              |                        |
| Leucylleucine              | 1.16          | 0.93  | 3.27   | Peptide       | Dipeptide                                            | LC-MS Pos | 3012   | 245.1 | 3303-31-9;  | 768,076,992,072    | <a href="#">C11332</a> |
| Leucylmethionine           | 0.67          | 1.76  | 1.45   | Peptide       | Dipeptide                                            | LC-MS Pos | 2504   | 263.2 | 36077-39-1; | 118276             |                        |
| Phenylalanylisoleucine     | 0.16          | 1.45  | 0.78   | Peptide       | Dipeptide                                            | LC-MS Neg | 4129   | 277.3 | 22951-94-6; |                    |                        |
| Phenylalanylleucine        | 0.26          | 1.22  | 1.77   | Peptide       | Dipeptide                                            | LC-MS Pos | 3273   | 279.2 | 3303-55-7;  | 4078229            |                        |
| Pro-Pro-Pro                | 1.04          | 0.27  | 0.01   | Peptide       | Polypeptide                                          | LC-MS Pos | 1720.1 | 310.2 | 19285-44-0; | 4475718            |                        |
| Serylleucine               | 0.75          | 1.91  | 0.31   | Peptide       | Dipeptide                                            | LC-MS Pos | 2106   | 219.2 | 6665-16-3;  |                    |                        |
| Serylphenylalanine         | 0.81          | 1.59  | 0.79   | Peptide       | Dipeptide                                            | LC-MS Pos | 2348   | 253.2 |             |                    |                        |
| Threonylleucine            | 0.71          | 3.08  | 0.71   | Peptide       | Dipeptide                                            | LC-MS Pos | 2204   | 233.2 | 50299-12-2; | 4420322            |                        |
| Threonylphenylalanine      | 0.31          | 2.18  | 0.48   | Peptide       | Dipeptide                                            | LC-MS Pos | 2500   | 267.2 |             | 40,997,994,099,798 |                        |
| Tyrosylisoleucine          | 0.35          | 1.51  | 1.45   | Peptide       | Dipeptide                                            | LC-MS Pos | 2518   | 295.2 | 40829-32-1; |                    |                        |
| Tyrosylleucine             | 0.59          | 1.80  | 1.47   | Peptide       | Dipeptide                                            | LC-MS Pos | 2656   | 295.2 | 17355-10-1; | 870,717,009,561    |                        |

## Supplemental Data for:

Richter, C.L., A.D. Kennedy, L. Guo, and N. Dokoozlian

Metabolomic measurements at three time points of a Chardonnay wine fermentation with *Saccharomyces cerevisiae*.

Am. J. Enol. Vitic. 66:294-301. doi: 10.5344/ajev.2015.14062.

**Supplemental Table 1** The complete yeast endo-metabolome identified in this study. Compound names are reported, as well as their CAS, PUBCHEM, and KEGG identifiers. The biological pathway to which the compound belongs, the method of identification, the retention index (RI), and size of the metabolite are also listed. Normalized concentrations of each compound are shown at the three time points. Data for each compound were rescaled to a median equal to 1.

| Compound                                              | Concentration |       |        | Super pathway | Subpathway                      | Platform  | RI     | Mass   | Identifier   |               |                               |
|-------------------------------------------------------|---------------|-------|--------|---------------|---------------------------------|-----------|--------|--------|--------------|---------------|-------------------------------|
|                                                       | Day 4         | Day 9 | Day 15 |               |                                 |           |        |        | CAS          | PUBCHEM       | KEGG                          |
| 2,4,6-Trihydroxybenzoate                              | 0.99          | 2.03  | 1.13   | Xenobiotics   | Benzoate metabolism             | LC-MS Neg | 1571   | 169.1  | 83-30-7;     | 66520         |                               |
| 2-(3,4-Dihydroxyphenyl)-3,5,7-Trihydroxy-4-chromanone | 0.49          | 1.70  | 4.53   | Xenobiotics   | Food component/plant            | LC-MS Neg | 2210   | 303.2  | 480-18-2;    | 471           |                               |
| 2-Pyrrolidinone                                       | 0.76          | 1.47  | 0.30   | Xenobiotics   | Chemical                        | GC-MS     | 1190.9 | 142    | 616-45-5;    | 12025         |                               |
| 3,4-Dihydroxybenzoate                                 | 0.87          | 1.40  | 1.35   | Xenobiotics   | Benzoate metabolism             | GC-MS     | 1768   | 193    | 99-50-3;     | 72            | <a href="#">C00230</a>        |
| 3,4-Dihydroxyphenylethanol                            | 1.71          | 0.83  | 0.99   | Xenobiotics   | Food component/plant            | GC-MS     | 1727   | 267.1  | 10597-60-1;  |               |                               |
| 3-Deoxyoctulosonate                                   | 1.22          | 0.79  | 0.83   | Xenobiotics   | Bacterial                       | GC-MS     | 1942   | 373.2  | 103404-70-2; | 4636210       |                               |
| Caffeate                                              | 0.37          | 1.16  | 2.49   | Xenobiotics   | Food component/plant            | GC-MS     | 1949.9 | 396.2  | 331-39-5;    | 689043        | <a href="#">C01197</a>        |
| Dihydrokaempferol                                     | 0.53          | 1.50  | 3.58   | Xenobiotics   | Food component/plant            | LC-MS Neg | 2568   | 287    | 480-20-6;    |               | <a href="#">C00974</a>        |
| Erythritol                                            | 2.37          | 1.21  | 0.52   | Xenobiotics   | Sugar, sugar substitute, starch | GC-MS     | 1517.5 | 217    | 149-32-6;    |               | <a href="#">C00503</a>        |
| Galactarate (mucic acid)                              | 0.79          | 1.12  | 1.97   | Xenobiotics   | Sugar, sugar substitute, starch | GC-MS     | 1899.3 | 333.1  | 526-99-8;    | 3037582       | <a href="#">C00879</a>        |
| Galactonate                                           | 0.26          | 1.91  | 0.51   | Xenobiotics   | Food component/plant            | GC-MS     | 1813.6 | 217.1  | 299-28-5;    | 128869        | <a href="#">C00880</a>        |
| Galacturonate                                         | 0.51          | 1.14  | 1.49   | Xenobiotics   | Sugar, sugar substitute, starch | GC-MS     | 1888.7 | 204    | 91510-62-2;  | 84740         | <a href="#">C08348</a>        |
| Gallate                                               | 0.70          | 1.00  | 1.10   | Xenobiotics   | Food component/plant            | GC-MS     | 1857   | 281    | 149-91-7;    | 370           | <a href="#">D01398,C01424</a> |
| Glycerol 2-phosphate                                  | 1.10          | 0.78  | 0.06   | Xenobiotics   | Chemical                        | GC-MS     | 1691.8 | 243    | 819-83-0;    | 2526          | <a href="#">C02979,D01488</a> |
| Glycolate (hydroxyacetate)                            | 1.12          | 0.58  | 0.29   | Xenobiotics   | Chemical                        | GC-MS     | 1119   | 177    | 79-14-1;     | 3,698,251,757 | <a href="#">C00160</a>        |
| Isorhamnetin                                          | 0.87          | 0.79  | 4.96   | Xenobiotics   | Food component/plant            | LC-MS Neg | 4086.8 | 315.1  | 480-19-3;    | 5281654       | <a href="#">C10084</a>        |
| Kaempferol                                            | 0.86          | 1.11  | 2.43   | Xenobiotics   | Food component/plant            | LC-MS Pos | 4587   | 287.1  | 520;         | 5280863       | <a href="#">C05903</a>        |
| Kaempferol 3-O-beta-glucoside                         | 0.46          | 1.47  | 2.51   | Xenobiotics   | Food component/plant            | LC-MS Pos | 3884   | 449    | 480-10-4;    |               |                               |
| Lidocaine                                             | 0.31          | 0.74  | 13.16  | Xenobiotics   | Drug                            | LC-MS Pos | 2761   | 235.2  | 137-58-6;    | 3676          | <a href="#">D00358</a>        |
| Naringenin                                            | 0.56          | 1.52  | 2.75   | Xenobiotics   | Food component-plant            | LC-MS Neg | 3484   | 271.1  | 67604-48-2;  | 932           | <a href="#">C00509</a>        |
| p-Aminobenzoate (PABA)                                | 0.77          | 0.58  | 0.25   | Xenobiotics   | Benzoate metabolism             | LC-MS Pos | 2120   | 138.1  | 150-13-0;    | 7,057,990,978 | <a href="#">C00568</a>        |
| Quercetin                                             | 0.21          | 1.20  | 2.82   | Xenobiotics   | Food component/plant            | LC-MS Pos | 4262   | 303.1  | 849061-97-8; | 5280343       | <a href="#">C00389</a>        |
| Quercetin-3-galactoside                               | 0.34          | 1.60  | 2.99   | Xenobiotics   | Food component/plant            | LC-MS Neg | 2706   | 463.2  | 482-36-0;    | 5281643       | <a href="#">C10073</a>        |
| Quinate                                               | 1.01          | 0.86  | 1.00   | Xenobiotics   | Food component/plant            | GC-MS     | 1791.5 | 345.1  | 77-95-2;     |               | <a href="#">C00296</a>        |
| Shikimate                                             | 0.72          | 1.23  | 1.39   | Xenobiotics   | Food component/plant            | GC-MS     | 1758.1 | 204    | 138-59-0;    | 8742          | <a href="#">C00493</a>        |
| Tartarate                                             | 0.83          | 1.12  | 3.56   | Xenobiotics   | Food component/plant            | LC-MS Neg | 604    | 149.1  | 6106-24-7;   | 875           | <a href="#">C00898</a>        |
| Trehalose 6-phosphate                                 | 0.13          | 2.20  | 0.05   | Xenobiotics   | Sugar, sugar substitute, starch | GC-MS     | 2310   | 315.16 | 136632-28-5; | 122336        | <a href="#">C00689</a>        |
| Trihydroxybutane                                      | 1.28          | 0.39  | 0.18   | Xenobiotics   | Food component/plant            | GC-MS     | 1329.5 | 117    | 4435-50-1;   | 20497         |                               |
| Quercetin-3-O-glucoside                               | 0.41          | 1.56  | 2.96   |               |                                 | LC-MS Neg | 2770   | 463    | 21637-25-2;  |               |                               |
| X – 03002                                             | 5.02          | 0.67  | 0.45   |               |                                 | GC-MS     | 1438.1 | 296.1  |              |               |                               |
| X – 03094                                             | 3.65          | 0.85  | 0.67   |               |                                 | GC-MS     | 1978.7 | 299    |              |               |                               |
| X – 03998                                             | 1.65          | 0.38  | 0.36   |               |                                 | GC-MS     | 1252   | 171    |              |               |                               |
| X – 04006                                             | 2.26          | 0.42  | 0.39   |               |                                 | GC-MS     | 1409.4 | 102    |              |               |                               |

## Supplemental Data for:

Richter, C.L., A.D. Kennedy, L. Guo, and N. Dokoozlian

Metabolomic measurements at three time points of a Chardonnay wine fermentation with *Saccharomyces cerevisiae*.

Am. J. Enol. Vitic. 66:294-301. doi: 10.5344/ajev.2015.14062.

**Supplemental Table 1** The complete yeast endo-metabolome identified in this study. Compound names are reported, as well as their CAS, PUBCHEM, and KEGG identifiers. The biological pathway to which the compound belongs, the method of identification, the retention index (RI), and size of the metabolite are also listed. Normalized concentrations of each compound are shown at the three time points. Data for each compound were rescaled to a median equal to 1.

| Compound | Concentration |       |        | Super pathway | Subpathway | Platform  | RI     | Mass  | Identifier |         |      |
|----------|---------------|-------|--------|---------------|------------|-----------|--------|-------|------------|---------|------|
|          | Day 4         | Day 9 | Day 15 |               |            |           |        |       | CAS        | PUBCHEM | KEGG |
| X-04033  | 3.93          | 1.11  | 0.17   |               |            | GC-MS     | 1774.6 | 112   |            |         |      |
| X-04051  | 2.02          | 0.78  | 0.98   |               |            | GC-MS     | 1968.7 | 357.1 |            |         |      |
| X-05214  | 0.41          | 1.47  | 0.49   |               |            | GC-MS     | 1960   | 117   |            |         |      |
| X-05228  | 1.83          | 0.30  | 0.29   |               |            | GC-MS     | 1442.5 | 181.1 |            |         |      |
| X-05406  | 0.99          | 0.87  | 0.75   |               |            | GC-MS     | 1404.6 | 306   |            |         |      |
| X-06650  | 1.33          | 1.49  | 0.21   |               |            | GC-MS     | 1991.9 | 188.2 |            |         |      |
| X-06666  | 1.79          | 0.93  | 0.22   |               |            | GC-MS     | 2053.1 | 318.2 |            |         |      |
| X-06667  | 0.78          | 1.12  | 0.75   |               |            | GC-MS     | 2074   | 217.1 |            |         |      |
| X-08889  | 0.94          | 7.70  | 0.11   |               |            | GC-MS     | 1634.3 | 521.2 |            |         |      |
| X-08895  | 4.35          | 0.56  | 0.14   |               |            | GC-MS     | 1792.3 | 174.1 |            |         |      |
| X-09429  | 3.02          | 0.06  | 0.04   |               |            | GC-MS     | 2286.3 | 204   |            |         |      |
| X-10356  | 1.76          | 0.98  | 0.25   |               |            | GC-MS     | 1714.4 | 333   |            |         |      |
| X-10358  | 1.25          | 0.96  | 0.54   |               |            | GC-MS     | 1729.5 | 292.1 |            |         |      |
| X-10500  | 1.14          | 0.83  | 0.30   |               |            | GC-MS     | 1229.9 | 211   |            |         |      |
| X-10607  | 1.61          | 1.21  | 0.14   |               |            | GC-MS     | 1918   | 326.1 |            |         |      |
| X-10649  | 2.08          | 1.07  | 0.71   |               |            | GC-MS     | 1345.7 | 140   |            |         |      |
| X-10677  | 1.88          | 0.93  | 0.17   |               |            | GC-MS     | 1438   | 269.1 |            |         |      |
| X-10806  | 0.16          | 1.88  | 1.33   |               |            | GC-MS     | 2189   | 318.2 |            |         |      |
| X-10876  | 1.86          | 0.92  | 0.37   |               |            | GC-MS     | 1485.9 | 70.9  |            |         |      |
| X-10882  | 1.20          | 0.23  | 0.17   |               |            | GC-MS     | 1774   | 367.1 |            |         |      |
| X-11334  | 0.44          | 1.32  | 0.46   |               |            | LC-MS Pos | 982    | 259.1 |            |         |      |
| X-11583  | 1.06          | 0.95  | 0.08   |               |            | LC-MS Pos | 2793   | 457.1 |            |         |      |
| X-11585  | 0.92          | 1.93  | 0.61   |               |            | LC-MS Pos | 2987   | 332   |            |         |      |
| X-11586  | 1.27          | 0.39  | 0.11   |               |            | LC-MS Pos | 3434   | 442   |            |         |      |
| X-11587  | 1.11          | 0.36  | 0.36   |               |            | LC-MS Pos | 3502   | 485.1 |            |         |      |
| X-11624  | 2.60          | 0.45  | 0.18   |               |            | LC-MS Pos | 2727.9 | 279   |            |         |      |
| X-11687  | 3.65          | 0.42  | 0.40   |               |            | LC-MS Pos | 2182   | 384.1 |            |         |      |
| X-11755  | 0.81          | 1.23  | 0.90   |               |            | GC-MS     | 1820   | 318.2 |            |         |      |
| X-11795  | 19.76         | 2.25  | 0.52   |               |            | LC-MS Pos | 1457   | 148.1 |            |         |      |
| X-12051  | 51.63         | 0.84  | 0.33   |               |            | LC-MS Pos | 5739   | 456.4 |            |         |      |
| X-12100  | 1.13          | 0.81  | 1.13   |               |            | LC-MS Pos | 1793   | 221.1 |            |         |      |
| X-12259  | 0.65          | 0.89  | 1.94   |               |            | LC-MS Neg | 724    | 133.2 |            |         |      |
| X-12421  | 1.59          | 0.75  | 0.75   |               |            | LC-MS Pos | 5876   | 370   |            |         |      |
| X-12422  | 1.54          | 0.69  | 0.69   |               |            | LC-MS Pos | 5937   | 370   |            |         |      |

## Supplemental Data for:

Richter, C.L., A.D. Kennedy, L. Guo, and N. Dokoozlian

Metabolomic measurements at three time points of a Chardonnay wine fermentation with *Saccharomyces cerevisiae*.

Am. J. Enol. Vitic. 66:294-301. doi: 10.5344/ajev.2015.14062.

**Supplemental Table 1** The complete yeast endo-metabolome identified in this study. Compound names are reported, as well as their CAS, PUBCHEM, and KEGG identifiers. The biological pathway to which the compound belongs, the method of identification, the retention index (RI), and size of the metabolite are also listed. Normalized concentrations of each compound are shown at the three time points. Data for each compound were rescaled to a median equal to 1.

| Compound  | Concentration |       |        | Super pathway | Subpathway | Platform  | RI     | Mass  | Identifier |         |      |
|-----------|---------------|-------|--------|---------------|------------|-----------|--------|-------|------------|---------|------|
|           | Day 4         | Day 9 | Day 15 |               |            |           |        |       | CAS        | PUBCHEM | KEGG |
| X - 12462 | 1.05          | 0.44  | 0.61   |               |            | LC-MS Pos | 1269   | 148.2 |            |         |      |
| X - 12510 | 0.96          | 0.88  | 0.88   |               |            | LC-MS Pos | 3343   | 160.2 |            |         |      |
| X - 12602 | 0.48          | 0.36  | 0.12   |               |            | LC-MS Pos | 1456   | 204.2 |            |         |      |
| X - 12660 | 1.39          | 0.66  | 0.66   |               |            | LC-MS Pos | 5667   | 442.2 |            |         |      |
| X - 12689 | 0.83          | 1.07  | 0.23   |               |            | LC-MS Pos | 1183   | 278.2 |            |         |      |
| X - 12824 | 1.03          | 1.97  | 0.42   |               |            | LC-MS Neg | 2803   | 243.2 |            |         |      |
| X - 12874 | 1.03          | 0.77  | 0.24   |               |            | LC-MS Neg | 4714   | 231.2 |            |         |      |
| X - 12886 | 0.93          | 0.88  | 1.10   |               |            | LC-MS Neg | 1007   | 189.2 |            |         |      |
| X - 12948 | 11.74         | 0.79  | 0.35   |               |            | LC-MS Pos | 1815   | 350.1 |            |         |      |
| X - 13042 | 0.96          | 0.93  | 1.18   |               |            | LC-MS Neg | 3193   | 385.2 |            |         |      |
| X - 13046 | 0.87          | 1.12  | 2.60   |               |            | LC-MS Neg | 1459   | 315.2 |            |         |      |
| X - 13111 | 0.68          | 1.69  | 0.69   |               |            | LC-MS Pos | 1386   | 344.2 |            |         |      |
| X - 13230 | 0.84          | 1.02  | 0.99   |               |            | LC-MS Neg | 674    | 161   |            |         |      |
| X - 13496 | 0.67          | 1.43  | 1.21   |               |            | GC-MS     | 2103.4 | 372.2 |            |         |      |
| X - 13497 | 1.01          | 0.88  | 0.10   |               |            | GC-MS     | 1596   | 211   |            |         |      |
| X - 13502 | 2.25          | 0.66  | 0.09   |               |            | LC-MS Pos | 874    | 306.1 |            |         |      |
| X - 13746 | 0.74          | 0.97  | 0.32   |               |            | GC-MS     | 1956   | 217.1 |            |         |      |
| X - 13772 | 0.87          | 2.08  | 0.63   |               |            | LC-MS Neg | 1799   | 243.2 |            |         |      |
| X - 13875 | 1.19          | 0.81  | 1.06   |               |            | LC-MS Neg | 1773   | 251.1 |            |         |      |
| X - 13928 | 0.89          | 0.32  | 0.38   |               |            | LC-MS Pos | 1947   | 190.1 |            |         |      |
| X - 14150 | 0.86          | 1.80  | 0.19   |               |            | LC-MS Pos | 1592   | 219.2 |            |         |      |
| X - 14294 | 0.13          | 0.20  | 2.03   |               |            | LC-MS Neg | 2186   | 422.2 |            |         |      |
| X - 14306 | 0.22          | 1.31  | 2.85   |               |            | LC-MS Pos | 2463   | 359.3 |            |         |      |
| X - 14338 | 0.41          | 2.09  | 2.14   |               |            | LC-MS Pos | 2600   | 265.2 |            |         |      |
| X - 14564 | 1.09          | 0.89  | 0.79   |               |            | LC-MS Neg | 6161   | 345.4 |            |         |      |
| X - 14900 | 0.86          | 1.05  | 1.31   |               |            | LC-MS Neg | 2117   | 258.2 |            |         |      |
| X - 15124 | 1.86          | 0.27  | 0.20   |               |            | LC-MS Pos | 1776   | 300   |            |         |      |
| X - 15134 | 1.91          | 0.44  | 0.31   |               |            | LC-MS Pos | 3198   | 321.1 |            |         |      |
| X - 15136 | 1.50          | 0.93  | 0.14   |               |            | LC-MS Pos | 4063   | 243.1 |            |         |      |
| X - 15312 | 1.03          | 1.25  | 0.41   |               |            | LC-MS Pos | 3079   | 331.9 |            |         |      |
| X - 15375 | 0.56          | 0.89  | 0.37   |               |            | LC-MS Pos | 2502   | 328   |            |         |      |
| X - 15382 | 1.28          | 0.69  | 0.63   |               |            | LC-MS Pos | 2540   | 271   |            |         |      |
| X - 15421 | 0.33          | 0.64  | 4.77   |               |            | LC-MS Neg | 3307   | 490.1 |            |         |      |
| X - 15422 | 4.65          | 0.98  | 0.32   |               |            | LC-MS Neg | 922    | 199   |            |         |      |

## Supplemental Data for:

Richter, C.L., A.D. Kennedy, L. Guo, and N. Dokoozlian

Metabolomic measurements at three time points of a Chardonnay wine fermentation with *Saccharomyces cerevisiae*.

Am. J. Enol. Vitic. 66:294-301. doi: 10.5344/ajev.2015.14062.

**Supplemental Table 1** The complete yeast endo-metabolome identified in this study. Compound names are reported, as well as their CAS, PUBCHEM, and KEGG identifiers. The biological pathway to which the compound belongs, the method of identification, the retention index (RI), and size of the metabolite are also listed. Normalized concentrations of each compound are shown at the three time points. Data for each compound were rescaled to a median equal to 1.

| Compound  | Concentration |       |        | Super pathway | Subpathway | Platform  | RI     | Mass  | Identifier |         |      |
|-----------|---------------|-------|--------|---------------|------------|-----------|--------|-------|------------|---------|------|
|           | Day 4         | Day 9 | Day 15 |               |            |           |        |       | CAS        | PUBCHEM | KEGG |
| X – 15484 | 1.66          | 0.78  | 0.86   |               |            | LC-MS Pos | 2506   | 271   |            |         |      |
| X – 15516 | 1.80          | 0.57  | 0.38   |               |            | LC-MS Pos | 1718   | 246.1 |            |         |      |
| X – 15532 | 1.04          | 0.96  | 0.29   |               |            | LC-MS Pos | 2351   | 260.2 |            |         |      |
| X – 15537 | 1.44          | 0.88  | 0.41   |               |            | LC-MS Pos | 4211   | 192.1 |            |         |      |
| X – 15546 | 3.84          | 0.69  | 0.29   |               |            | LC-MS Pos | 1861   | 271.1 |            |         |      |
| X – 15558 | 0.70          | 0.76  | 0.35   |               |            | LC-MS Pos | 4346   | 342.1 |            |         |      |
| X – 15562 | 0.86          | 1.28  | 0.12   |               |            | LC-MS Pos | 4686   | 470.1 |            |         |      |
| X – 15563 | 0.78          | 1.31  | 0.11   |               |            | LC-MS Pos | 4749   | 490   |            |         |      |
| X – 15591 | 0.77          | 0.62  | 0.06   |               |            | LC-MS Neg | 1790   | 203.1 |            |         |      |
| X – 15787 | 0.97          | 1.27  | 0.09   |               |            | GC-MS     | 2103   | 519.4 |            |         |      |
| X – 15797 | 1.63          | 0.19  | 0.26   |               |            | LC-MS Neg | 1786   | 160.2 |            |         |      |
| X – 15807 | 2.89          | 0.17  | 0.17   |               |            | LC-MS Neg | 3366   | 337.2 |            |         |      |
| X – 15812 | 2.03          | 0.82  | 0.15   |               |            | LC-MS Pos | 1716   | 375.1 |            |         |      |
| X – 15819 | 0.14          | 0.74  | 0.14   |               |            | GC-MS     | 2066   | 315.1 |            |         |      |
| X – 15868 | 0.94          | 1.00  | 1.73   |               |            | LC-MS Neg | 1516   | 325.1 |            |         |      |
| X – 16063 | 3.83          | 0.65  | 0.32   |               |            | LC-MS Neg | 4770   | 341.1 |            |         |      |
| X – 16094 | 1.12          | 0.12  | 0.08   |               |            | LC-MS Pos | 3691   | 276.2 |            |         |      |
| X – 16296 | 0.88          | 0.98  | 1.50   |               |            | LC-MS Neg | 3463.6 | 174.1 |            |         |      |
| X – 16310 | 0.32          | 1.43  | 0.54   |               |            | LC-MS Pos | 924.7  | 212.1 |            |         |      |
| X – 16439 | 0.67          | 1.10  | 0.36   |               |            | LC-MS Pos | 3795.8 | 322.1 |            |         |      |
| X – 16468 | 1.20          | 0.85  | 0.30   |               |            | LC-MS Pos | 2143.4 | 246.1 |            |         |      |
| X – 16693 | 1.19          | 0.80  | 0.23   |               |            | LC-MS Pos | 1628.4 | 176   |            |         |      |
| X – 16869 | 0.97          | 0.03  | 0.03   |               |            | LC-MS Neg | 5179.8 | 330.2 |            |         |      |
| X – 17071 | 10.22         | 0.34  | 0.27   |               |            | LC-MS Neg | 2058.5 | 399.1 |            |         |      |
| X – 17147 | 1.89          | 1.04  | 0.35   |               |            | LC-MS Neg | 4830   | 187.2 |            |         |      |
| X – 17151 | 1.48          | 0.72  | 0.54   |               |            | LC-MS Neg | 4811   | 169.2 |            |         |      |
| X – 17430 | 0.83          | 1.26  | 0.23   |               |            | LC-MS Pos | 4716.8 | 473.3 |            |         |      |
| X – 17485 | 2.42          | 1.10  | 0.05   |               |            | GC-MS     | 2031   | 493.2 |            |         |      |
| X – 17491 | 6.05          | 1.05  | 0.05   |               |            | LC-MS Neg | 1188.9 | 405.2 |            |         |      |
| X – 17543 | 1.03          | 0.25  | 0.29   |               |            | LC-MS Neg | 1236.4 | 188.2 |            |         |      |

## Supplemental Data for:

Richter, C.L., A.D. Kennedy, L. Guo, and N. Dokoozlian

Metabolomic measurements at three time points of a Chardonnay wine fermentation with *Saccharomyces cerevisiae*.

Am. J. Enol. Vitic. 66:294-301. doi: 10.5344/ajev.2015.14062.

**Supplemental Table 2** The complete exo-metabolome identified in this study. Compound names are reported, along with their CAS, PUBCHEM, and KEGG identifiers. The biological pathway to which the compound belongs, the method of identification, the retention index (RI), and the sizes of the metabolites are also listed. Normalized concentrations of each compound are shown for the three time points.

| Compound                          | Concentration |       |        | Super pathway | Subpathway                                  | Platform  | RI     | Mass  | Identifier        |                   |                               |
|-----------------------------------|---------------|-------|--------|---------------|---------------------------------------------|-----------|--------|-------|-------------------|-------------------|-------------------------------|
|                                   | Day 4         | Day 9 | Day 15 |               |                                             |           |        |       | CAS               | PUBCHEM           | KEGG                          |
| 3-(4-Hydroxyphenyl)lactate (HPLA) | 0.76          | 1.24  | 0.95   | Amino acid    | Phenylalanine and tyrosine metabolism       | LC-MS Neg | 1395   | 181.1 | 6482-98-0;        | 9378              | <a href="#">C03672</a>        |
| 4-Guanidinobutanoate              | 1.88          | 1.26  | 0.89   | Amino acid    | Guanidino and acetamido metabolism          | LC-MS Pos | 1085   | 146.1 | 463-003;463-00-3; | 500               | <a href="#">C01035</a>        |
| 5-Oxoproline                      | 1.02          | 1.04  | 1.12   | Amino acid    | Glutathione metabolism                      | LC-MS Pos | 1446   | 130.1 | 98-79-3;          | 7405              | <a href="#">C01879</a>        |
| Agmatine                          | 0.18          | 0.98  | 0.98   | Amino acid    | Polyamine metabolism                        | GC-MS     | 1526   | 174   | 2482-00-0;        | 199               | <a href="#">C00179</a>        |
| Alanine                           | 1.11          | 1.29  | 2.95   | Amino acid    | Alanine and aspartate metabolism            | GC-MS     | 1147.6 | 115.9 | 56-41-7;          | 59,507,311,724    | <a href="#">C00041</a>        |
| allo-threonine                    | 0.93          | 0.95  | 0.94   | Amino acid    | Glycine, serine, and threonine metabolism   | GC-MS     | 1417.8 | 219   | 28954-12-3;       | 992,896,995,276   | <a href="#">C05519</a>        |
| a-Hydroxyisovalerate              | 0.97          | 1.07  | 0.72   | Amino acid    | Valine, leucine, and isoleucine metabolism  | GC-MS     | 1208   | 145.1 | 600-37-3;         | 99823             |                               |
| Arginine                          | 1.99          | 0.87  | 1.12   | Amino acid    | Urea cycle; arginine and proline metabolism | LC-MS Pos | 650    | 175.2 | 1119-34-2;        | 5,246,487,232     | <a href="#">C00062</a>        |
| Asparagine                        | 0.46          | 1.73  | 2.28   | Amino acid    | Alanine and aspartate metabolism            | GC-MS     | 1651.2 | 231   | 70-47-3;          | 62,676,992,089    | <a href="#">C00152</a>        |
| Aspartate                         | 0.43          | 1.22  | 3.61   | Amino acid    | Alanine and aspartate metabolism            | GC-MS     | 1529.7 | 232   | 56-84-8;          | 5960              | <a href="#">C00049</a>        |
| b-Alanine                         | 1.21          | 1.03  | 1.16   | Amino acid    | Alanine and aspartate metabolism            | GC-MS     | 1451.8 | 174   | 56-41-7;107-95-9; | 2,394,755,801     | <a href="#">C00099</a>        |
| b-Hydroxypyruvate                 | 3.16          | 1.33  | 0.90   | Amino acid    | Glycine, serine, and threonine metabolism   | GC-MS     | 1425.1 | 221   | 3369-79-7;        | 964               | <a href="#">C00168</a>        |
| Betaine                           | 0.27          | 0.75  | 1.43   | Amino acid    | Glycine, serine, and threonine metabolism   | LC-MS Pos | 721    | 118.2 | 107-43-7;         | 247               |                               |
| Citramalate                       | 0.79          | 1.81  | 1.87   | Amino acid    | Valine, leucine, and isoleucine metabolism  | GC-MS     | 1490.7 | 247   | 6236-10-8;        | 1081              | <a href="#">C02612.C00815</a> |
| g-Aminobutyrate (GABA)            | 1.11          | 1.24  | 1.21   | Amino acid    | Glutamate metabolism                        | GC-MS     | 1539.7 | 304.1 | 56-12-2;          | 6,992,099,119     | <a href="#">C00334</a>        |
| Glutamate                         | 1.64          | 1.03  | 2.49   | Amino acid    | Glutamate metabolism                        | GC-MS     | 1611.9 | 246   | 56-86-0;          | 611               | <a href="#">C00025</a>        |
| Glutamine                         | 0.88          | 0.99  | 1.14   | Amino acid    | Glutamate metabolism                        | LC-MS Pos | 684    | 147.2 | 56-85-9;          | 69,920,865,961    | <a href="#">C00064</a>        |
| Glutarate (pentanedioate)         | 0.47          | 1.08  | 1.27   | Amino acid    | Lysine metabolism                           | GC-MS     | 1433.6 | 261   | 110-94-1;         | 4418048           | <a href="#">C00489</a>        |
| Glutathione, oxidized (GSSG)      | 0.74          | 1.03  | 1.56   | Amino acid    | Glutathione metabolism                      | LC-MS Pos | 1535   | 613.1 | 103239-24-3;      | 6,535,911,215,652 | <a href="#">C00127</a>        |
| Glutathione, reduced (GSH)        | 0.27          | 3.83  | 3.65   | Amino acid    | Glutathione metabolism                      | LC-MS Pos | 1274   | 308.1 | 70-18-8;          | 124886            | <a href="#">C00051</a>        |
| Glycine                           | 0.39          | 1.27  | 1.71   | Amino acid    | Glycine, serine, and threonine metabolism   | GC-MS     | 1166   | 101.9 | 56-40-6;          | 5,257,127,750     | <a href="#">C00037</a>        |
| Histidine                         | 1.51          | 1.82  | 3.71   | Amino acid    | Histidine metabolism                        | GC-MS     | 1837.3 | 154   | 5934-29-2;        | 7,733,651,426     | <a href="#">C00135</a>        |
| Homoserine (homoserine lactone)   | 0.89          | 1.57  | 3.35   | Amino acid    | Glycine, serine, and threonine metabolism   | GC-MS     | 1471   | 218.1 | 672-15-1;         | 126,476,971,022   | <a href="#">C00263.C02926</a> |
| Imidazole lactate                 | 1.21          | 1.07  | 0.93   | Amino acid    | Histidine metabolism                        | LC-MS Pos | 778    | 157.1 | 14403-45-3;       | 440129            | <a href="#">C05568</a>        |
| Isoleucine                        | 0.46          | 1.49  | 4.80   | Amino acid    | Valine, leucine, and isoleucine metabolism  | LC-MS Pos | 1614   | 132.1 | 73-32-5;          | 791               | <a href="#">C00407</a>        |



## Supplemental Data for:

Richter, C.L., A.D. Kennedy, L. Guo, and N. Dokoozlian

Metabolomic measurements at three time points of a Chardonnay wine fermentation with *Saccharomyces cerevisiae*.

Am. J. Enol. Vitic. 66:294-301. doi: 10.5344/ajev.2015.14062.

**Supplemental Table 2** The complete exo-metabolome identified in this study. Compound names are reported, along with their CAS, PUBCHEM, and KEGG identifiers. The biological pathway to which the compound belongs, the method of identification, the retention index (RI), and the sizes of the metabolites are also listed. Normalized concentrations of each compound are shown for the three time points.

| Compound                                        | Concentration |       |        | Super pathway | Subpathway                                    | Platform  | RI     | Mass  | Identifier |                   |                                |
|-------------------------------------------------|---------------|-------|--------|---------------|-----------------------------------------------|-----------|--------|-------|------------|-------------------|--------------------------------|
|                                                 | Day 4         | Day 9 | Day 15 |               |                                               |           |        |       | CAS        | PUBCHEM           | KEGG                           |
| Kynurenate                                      | 1.31          | 1.11  | 0.73   | Amino acid    | Tryptophan metabolism                         | LC-MS Neg | 2243   | 188.1 | 492-27-3;  | 3845              | <a href="#">C01717</a>         |
| Kynurenine                                      | 1.31          | 0.93  | 0.76   | Amino acid    | Tryptophan metabolism                         | LC-MS Pos | 1902   | 209.1 | 2922-83-0; | 1,611,666,971,029 | <a href="#">C00328</a>         |
| Leucine                                         | 0.22          | 1.24  | 5.74   | Amino acid    | Valine, leucine, and isoleucine metabolism    | LC-MS Pos | 1674   | 132.2 | 61-90-5;   | 70,457,986,106    | <a href="#">C00123</a>         |
| Lysine                                          | 0.37          | 1.08  | 4.40   | Amino acid    | Lysine metabolism                             | GC-MS     | 1836.7 | 317.2 | 56-87-1;   | 5962              | <a href="#">C00047</a>         |
| Methionine                                      | 0.99          | 1.65  | 2.37   | Amino acid    | Cysteine, methionine, SAM, taurine metabolism | LC-MS Pos | 1252   | 150.1 | 63-68-3;   | 69,920,876,137    | <a href="#">C00073</a>         |
| N-Acetylglutamine                               | 1.03          | 0.99  | 1.15   | Amino acid    | Glutamate metabolism                          | LC-MS Pos | 1204   | 189.1 | 2490-97-3; | 182230            | <a href="#">C02716</a>         |
| N-Acetylglycine                                 | 0.46          | 1.03  | 1.55   | Amino acid    | Glycine, serine, and threonine metabolism     | GC-MS     | 1396.4 | 143.9 | 543-24-8;  | 10972             |                                |
| N-Acetylisoleucine                              | 1.05          | 1.34  | 0.90   | Amino acid    | Valine, leucine, and isoleucine metabolism    | LC-MS Pos | 3370   | 174.1 |            | 2802421           |                                |
| N-Acetylleucine                                 | 0.55          | 1.82  | 1.28   | Amino acid    | Valine, leucine, and isoleucine metabolism    | LC-MS Pos | 3444   | 174.1 | 1188-21-2; | 70912             | <a href="#">C02710</a>         |
| N-Acetylmethionine                              | 0.72          | 1.13  | 1.57   | Amino acid    | Cysteine, methionine, SAM, taurine metabolism | LC-MS Neg | 1805   | 190.1 | 65-82-7;   | 448580            | <a href="#">C02712</a>         |
| N-Acetylphenylalanine                           | 0.51          | 1.21  | 1.11   | Amino acid    | Phenylalanine and tyrosine metabolism         | LC-MS Pos | 3563   | 208.1 | 2018-61-3; | 74839             | <a href="#">C03519</a>         |
| N-Acetylproline                                 | 0.54          | 2.89  | 3.37   | Amino acid    | Urea cycle; arginine and proline metabolism   | LC-MS Pos | 2184   | 158.1 | 1074-79-9; | 322640            |                                |
| N-Acetylvaline                                  | 0.59          | 1.02  | 1.32   | Amino acid    | Valine, leucine, and isoleucine metabolism    | LC-MS Pos | 2654   | 160.1 | 96-81-1;   | 66789             |                                |
| N <sub>6</sub> -acetyllysine                    | 0.69          | 1.02  | 1.48   | Amino acid    | Lysine metabolism                             | LC-MS Pos | 1134   | 189.1 | 692-04-6;  | 699,197,892,832   | <a href="#">C02727</a>         |
| Phenethylamine (isobar with 1-phenylethylamine) | 1.05          | 1.09  | 1.00   | Amino acid    | Phenylalanine and tyrosine metabolism         | LC-MS Pos | 2114.7 | 122.1 |            |                   | <a href="#">C02455, C05332</a> |
| Phenylalanine                                   | 0.19          | 1.15  | 4.74   | Amino acid    | Phenylalanine and tyrosine metabolism         | LC-MS Pos | 2056   | 166.1 | 63-91-2;   | 69,256,656,140    | <a href="#">C00079</a>         |
| Phenyllactate (PLA)                             | 0.23          | 0.98  | 0.87   | Amino acid    | Phenylalanine and tyrosine metabolism         | LC-MS Neg | 2237   | 165.1 | 828-01-3;  | 3848              | <a href="#">C05607</a>         |
| Pipecolate                                      | 0.79          | 1.04  | 1.08   | Amino acid    | Lysine metabolism                             | GC-MS     | 1396.1 | 156   | 4043-87-2; | 849               | <a href="#">C00408</a>         |
| Proline                                         | 0.84          | 0.97  | 1.07   | Amino acid    | Urea cycle; arginine and proline metabolism   | LC-MS Pos | 796    | 116.1 | 147-85-3;  | 1,457,426,971,047 | <a href="#">C00148</a>         |
| Putrescine                                      | 1.15          | 1.25  | 1.47   | Amino acid    | Polyamine metabolism                          | GC-MS     | 1705.8 | 174   | 110-60-1;  |                   | <a href="#">C00134</a>         |
| Pyroglutamine                                   | 0.92          | 0.97  | 1.01   | Amino acid    | Glutamate metabolism                          | LC-MS Pos | 764    | 129.2 |            | 134508            |                                |
| S-Adenosylhomocysteine (SAH)                    | 1.04          | 1.05  | 1.00   | Amino acid    | Cysteine, methionine, SAM, taurine metabolism | LC-MS Neg | 1821   | 383.1 | 979-92-0;  |                   | <a href="#">C00021</a>         |

## Supplemental Data for:

Richter, C.L., A.D. Kennedy, L. Guo, and N. Dokoozlian

Metabolomic measurements at three time points of a Chardonnay wine fermentation with *Saccharomyces cerevisiae*.

Am. J. Enol. Vitic. 66:294-301. doi: 10.5344/ajev.2015.14062.

**Supplemental Table 2** The complete exo-metabolome identified in this study. Compound names are reported, along with their CAS, PUBCHEM, and KEGG identifiers. The biological pathway to which the compound belongs, the method of identification, the retention index (RI), and the sizes of the metabolites are also listed. Normalized concentrations of each compound are shown for the three time points.

| Compound                   | Concentration |       |        | Super pathway | Subpathway                                                   | Platform  | RI     | Mass  | Identifier   |                 |                        |
|----------------------------|---------------|-------|--------|---------------|--------------------------------------------------------------|-----------|--------|-------|--------------|-----------------|------------------------|
|                            | Day 4         | Day 9 | Day 15 |               |                                                              |           |        |       | CAS          | PUBCHEM         | KEGG                   |
| S-Adenosylmethionine (SAM) | 0.08          | 1.57  | 3.26   | Amino acid    | Cysteine, methionine, SAM, taurine metabolism                | LC-MS Pos | 676    | 399.1 | 24346-00-7;  |                 |                        |
| Saccharopine               | 0.17          | 1.12  | 3.49   | Amino acid    | Lysine metabolism                                            | LC-MS Pos | 695    | 277.1 | 997-68-2;    | 160556          | <a href="#">C00449</a> |
| Serine                     | 0.59          | 1.58  | 3.00   | Amino acid    | Glycine, serine, and threonine metabolism                    | GC-MS     | 1389.1 | 204   | 56-45-1;     | 59,516,857,581  | <a href="#">C00065</a> |
| Spermidine                 | 0.77          | 1.45  | 5.08   | Amino acid    | Polyamine metabolism                                         | GC-MS     | 1998.9 | 144   | 124-20-9;    | 1102            | <a href="#">C00315</a> |
| Threonine                  | 0.56          | 0.88  | 1.95   | Amino acid    | Glycine, serine, and threonine metabolism                    | LC-MS Pos | 713    | 120.1 | 72-19-5;     | 69,710,196,288  | <a href="#">C00188</a> |
| Hydroxyproline             | 0.86          | 1.12  | 1.07   | Amino acid    | Urea cycle; arginine and proline metabolism                  | GC-MS     | 1537   | 140   | 51-35-4;     | 58,106,971,053  | <a href="#">C01157</a> |
| Tryptophan                 | 3.33          | 0.96  | 0.99   | Amino acid    | Tryptophan metabolism                                        | LC-MS Pos | 2445   | 205.1 | 73-22-3;     | 69,235,166,305  | <a href="#">C00078</a> |
| Tyrosine                   | 1.66          | 0.99  | 1.81   | Amino acid    | Phenylalanine and tyrosine metabolism                        | LC-MS Pos | 1516   | 182.1 | 60-18-4;     | 60,576,942,100  | <a href="#">C00082</a> |
| Urea                       | 0.19          | 0.90  | 1.35   | Amino acid    | Urea cycle; arginine and proline metabolism                  | GC-MS     | 1287.7 | 189   | 57-13-6;     | 117,616,150,869 | <a href="#">C00086</a> |
| Valine                     | 0.60          | 1.11  | 4.48   | Amino acid    | Valine, leucine, and isoleucine metabolism                   | LC-MS Pos | 1040   | 118.1 | 72-18-4;     | 69,710,186,287  | <a href="#">C00183</a> |
| Dihydroxyacetone           | 21.27         | 2.28  | 0.32   | Carbohydrate  | Glycolysis, gluconeogenesis, pyruvate metabolism             | GC-MS     | 1263   | 103   | 62147-49-3;  | 670             | <a href="#">C00184</a> |
| 2,3-Butanediol             | 0.78          | 2.15  | 1.50   | Carbohydrate  | Glycolysis, gluconeogenesis, pyruvate metabolism             | GC-MS     | 1075   | 116.9 | 24347-58-8;  |                 | <a href="#">C03044</a> |
| 2-Isopropylmalate          | 0.73          | 0.70  | 0.66   | Carbohydrate  | Glycolysis, gluconeogenesis, pyruvate metabolism             | LC-MS Pos | 2917   | 194.1 | 3237-44-3;   | 77              | <a href="#">C02504</a> |
| Arabinose                  | 0.78          | 1.10  | 1.10   | Carbohydrate  | Nucleotide sugars, pentose metabolism                        | GC-MS     | 1631.6 | 217   | 28697-53-2;  | 66308           | <a href="#">C00181</a> |
| Arabitol                   | 0.83          | 0.98  | 1.04   | Carbohydrate  | Nucleotide sugars, pentose metabolism                        | GC-MS     | 1687.5 | 307.1 | 488-82-4;    | 94154           | <a href="#">C00474</a> |
| Erythronate                | 0.81          | 1.17  | 1.08   | Carbohydrate  | Amino-sugar metabolism                                       | GC-MS     | 1546.9 | 292.1 | 13752-84-6;  | 2781043         |                        |
| Erythrose                  | 2.41          | 1.69  | 0.56   | Carbohydrate  | Fructose, mannose, galactose, starch, and sucrose metabolism | GC-MS     | 1431.1 | 217.1 | 583-50-6;    | 94176           | <a href="#">C01796</a> |
| Fructose                   | 1.75          | 1.28  | 0.04   | Carbohydrate  | Fructose, mannose, galactose, starch, and sucrose metabolism | GC-MS     | 1758   | 217   | 57-48-7;     | 5984            | <a href="#">C00095</a> |
| Fructose 6-phosphate       | 2.29          | 1.28  | 0.73   | Carbohydrate  | Glycolysis, gluconeogenesis, pyruvate metabolism             | GC-MS     | 1994.9 | 315.1 | 103213-47-4; |                 | <a href="#">C05345</a> |
| Galactinol                 | 1.51          | 1.17  | 0.72   | Carbohydrate  | Fructose, mannose, galactose, starch, and sucrose metabolism | GC-MS     | 2226.1 | 433.3 | 16908-86-4;  |                 | <a href="#">C01235</a> |

## Supplemental Data for:

Richter, C.L., A.D. Kennedy, L. Guo, and N. Dokoozlian

Metabolomic measurements at three time points of a Chardonnay wine fermentation with *Saccharomyces cerevisiae*.

Am. J. Enol. Vitic. 66:294-301. doi: 10.5344/ajev.2015.14062.

**Supplemental Table 2** The complete exo-metabolome identified in this study. Compound names are reported, along with their CAS, PUBCHEM, and KEGG identifiers. The biological pathway to which the compound belongs, the method of identification, the retention index (RI), and the sizes of the metabolites are also listed. Normalized concentrations of each compound are shown for the three time points.

| Compound                 | Concentration |       |        | Super pathway          | Subpathway                                                   | Platform | RI     | Mass  | Identifier  |         |                               |
|--------------------------|---------------|-------|--------|------------------------|--------------------------------------------------------------|----------|--------|-------|-------------|---------|-------------------------------|
|                          | Day 4         | Day 9 | Day 15 |                        |                                                              |          |        |       | CAS         | PUBCHEM | KEGG                          |
| Galactitol (dulcitol)    | 0.66          | 0.96  | 1.18   | Carbohydrate           | Fructose, mannose, galactose, starch, and sucrose metabolism | GC-MS    | 1849.2 | 319.1 | 608-66-2;   | 11850   | <a href="#">C01697</a>        |
| Galactose                | 21.85         | 1.36  | 0.69   | Carbohydrate           | Fructose, mannose, galactose, starch, and sucrose metabolism | GC-MS    | 1793.8 | 203.9 | 59-23-4;    | 3037556 | <a href="#">C01582</a>        |
| Glucose                  | 15.42         | 2.61  | 0.01   | Carbohydrate           | Glycolysis, gluconeogenesis, pyruvate metabolism             | GC-MS    | 1866.8 | 217.1 | 50-99-7;    | 79025   | <a href="#">C00293</a>        |
| Glycerate                | 0.93          | 1.25  | 1.12   | Carbohydrate           | Glycolysis, gluconeogenesis, pyruvate metabolism             | GC-MS    | 1360.7 | 189   | 600-19-1;   | 752     | <a href="#">C00258</a>        |
| Isomaltose               | 0.85          | 1.02  | 1.08   | Carbohydrate           | Fructose, mannose, galactose, starch, and sucrose metabolism | GC-MS    | 2221.8 | 204.1 | 499-40-1;   | 439193  | <a href="#">C00252</a>        |
| Lactate                  | 1.10          | 1.71  | 0.89   | Carbohydrate           | Glycolysis, gluconeogenesis, pyruvate metabolism             | GC-MS    | 1102.8 | 116.9 | 79-33-4;    | 612     | <a href="#">C00186</a>        |
| Maltose                  | 1.20          | 1.24  | 0.71   | Carbohydrate           | Fructose, mannose, galactose, starch, and sucrose metabolism | GC-MS    | 2142.1 | 204.1 | 6363-53-7;  | 439341  | <a href="#">C00208</a>        |
| Mannitol                 | 0.89          | 1.10  | 1.93   | Carbohydrate           | Fructose, mannose, galactose, starch, and sucrose metabolism | GC-MS    | 1839   | 319.1 | 69-65-8;    | 6251    | <a href="#">C00392</a>        |
| N-Acetylglucosamine      | 0.73          | 0.79  | 1.01   | Carbohydrate           | Amino-sugar metabolism                                       | GC-MS    | 1903.3 | 245   | 7512-17-6;  | 24139   | <a href="#">C00140</a>        |
| Pyruvate                 | 5.17          | 1.30  | 0.26   | Carbohydrate           | Glycolysis, gluconeogenesis, pyruvate metabolism             | GC-MS    | 1130.6 | 217   | 127-17-3;   | 107735  | <a href="#">C00022</a>        |
| Ribitol                  | 0.77          | 0.80  | 0.97   | Carbohydrate           | Nucleotide sugars, pentose metabolism                        | GC-MS    | 1692.4 | 217   | 488-81-3;   |         | <a href="#">C00474</a>        |
| Ribose                   | 0.62          | 1.05  | 1.05   | Carbohydrate           | Nucleotide sugars, pentose metabolism                        | GC-MS    | 1639.2 | 204   | 50-69-1;    | 5311110 | <a href="#">C00121</a>        |
| Ribulose                 | 1.85          | 0.97  | 0.83   | Carbohydrate           | Nucleotide sugars, pentose metabolism                        | GC-MS    | 1662   | 306.1 | 488-84-6;   | 79021   | <a href="#">C00309</a>        |
| Sorbitol                 | 0.60          | 1.06  | 0.66   | Carbohydrate           | Fructose, mannose, galactose, starch, and sucrose metabolism | GC-MS    | 1843   | 319.1 | 6706-59-8;  | 107428  | <a href="#">C00794</a>        |
| Threitol                 | 0.95          | 1.16  | 1.01   | Carbohydrate           | Nucleotide sugars, pentose metabolism                        | GC-MS    | 1513   | 217.1 | 2418-52-2;  | 169019  | <a href="#">C16884</a>        |
| Xylitol                  | 2.14          | 1.29  | 0.59   | Carbohydrate           | Nucleotide sugars, pentose metabolism                        | GC-MS    | 1677.6 | 307.2 | 87-99-0;    | 6912    | <a href="#">C00379</a>        |
| Xylonate                 | 0.84          | 1.53  | 1.40   | Carbohydrate           | Nucleotide sugars, pentose metabolism                        | GC-MS    | 1722   | 292   | 73686-31-7; | 6602431 | <a href="#">C00502,C05411</a> |
| Xylose                   | 0.60          | 1.09  | 1.12   | Carbohydrate           | Nucleotide sugars, pentose metabolism                        | GC-MS    | 1723.9 | 204   | 609-06-3;   | 95259   | <a href="#">C00181</a>        |
| 2,3-Dihydroxyisovalerate | 0.25          | 1.06  | 0.94   | Cofactors and vitamins | Pantothenate and CoA metabolism                              | GC-MS    | 1422   | 131   | 1756-18-9;  | 677     | <a href="#">C04039</a>        |

## Supplemental Data for:

Richter, C.L., A.D. Kennedy, L. Guo, and N. Dokoozlian

Metabolomic measurements at three time points of a Chardonnay wine fermentation with *Saccharomyces cerevisiae*.

Am. J. Enol. Vitic. 66:294-301. doi: 10.5344/ajev.2015.14062.

**Supplemental Table 2** The complete exo-metabolome identified in this study. Compound names are reported, along with their CAS, PUBCHEM, and KEGG identifiers. The biological pathway to which the compound belongs, the method of identification, the retention index (RI), and the sizes of the metabolites are also listed. Normalized concentrations of each compound are shown for the three time points.

| Compound                                   | Concentration |       |        | Super pathway          | Subpathway                             | Platform  | RI     | Mass   | Identifier                    |                           |                                                    |
|--------------------------------------------|---------------|-------|--------|------------------------|----------------------------------------|-----------|--------|--------|-------------------------------|---------------------------|----------------------------------------------------|
|                                            | Day 4         | Day 9 | Day 15 |                        |                                        |           |        |        | CAS                           | PUBCHEM                   | KEGG                                               |
| NAD <sup>+</sup>                           | 0.53          | 1.14  | 3.31   | Cofactors and vitamins | Nicotinate and nicotinamide metabolism | LC-MS Pos | 1370   | 664    | 53-84-9;                      | 1,089,765,158,925,290,000 | <a href="#">C00003</a>                             |
| Nicotinate ribonucleoside                  | 1.39          | 1.58  | 2.06   | Cofactors and vitamins | Nicotinate and nicotinamide metabolism | LC-MS Pos | 1105   | 256    | 2625-49-2;                    | 161233                    |                                                    |
| Pantothenate (vitamin B5)                  | 1.05          | 0.89  | 0.70   | Cofactors and vitamins | Pantothenate and CoA metabolism        | LC-MS Pos | 2218   | 220.1  | 137-08-6;                     | 6613                      | <a href="#">C00864</a>                             |
| Pyridoxal                                  | 0.32          | 1.01  | 1.26   | Cofactors and vitamins | Pyridoxal metabolism                   | LC-MS Pos | 1210   | 168.1  | 65-22-5;                      | 1050                      | <a href="#">C00250</a>                             |
| Pyridoxate                                 | 1.00          | 0.97  | 0.95   | Cofactors and vitamins | Vitamin B6 metabolism                  | LC-MS Neg | 2210   | 182.1  | 82-82-6;                      | 6723                      | <a href="#">C00847</a>                             |
| Riboflavin (vitamin B2)                    | 0.53          | 0.87  | 1.90   | Cofactors and vitamins | Riboflavin metabolism                  | LC-MS Pos | 3111   | 377.2  | 83-88-5;                      | 493570                    | <a href="#">C00255</a>                             |
| Threonate                                  | 0.90          | 1.09  | 1.05   | Cofactors and vitamins | Ascorbate and aldarate metabolism      | GC-MS     | 1560.7 | 292.1  | 70753-61-6;                   | 151152                    | <a href="#">C01620</a>                             |
| Trigonelline ( <i>N</i> -methylnicotinate) | 0.60          | 0.89  | 1.15   | Cofactors and vitamins | Nicotinate and nicotinamide metabolism | LC-MS Pos | 757    | 138.1  | 6138-41-6;                    | 5570                      |                                                    |
| Acetylphosphate                            | 0.21          | 1.07  | 1.53   | Energy                 | Oxidative phosphorylation              | GC-MS     | 1263   | 211    | 94249-01-1;                   | 186                       | <a href="#">C00227</a>                             |
| a-Ketoglutarate                            | 1.88          | 0.99  | 0.76   | Energy                 | Krebs cycle                            | GC-MS     | 1601.5 | 347.1  | 305-72-6;328-50-7;22202-68-2; | 51                        | <a href="#">C00026</a>                             |
| Citrate                                    | 0.90          | 0.99  | 1.00   | Energy                 | Krebs cycle                            | LC-MS Neg | 591    | 191.1  | 77-92-9;                      | 311                       | <a href="#">C00158</a>                             |
| Fumarate                                   | 0.93          | 0.94  | 1.32   | Energy                 | Krebs cycle                            | GC-MS     | 1382.1 | 245    | 100-17-8;                     |                           | <a href="#">C00122</a>                             |
| Homocitrate                                | 0.89          | 1.06  | 0.98   | Energy                 | Krebs cycle                            | GC-MS     | 1836.8 | 287.1  | 3562-74-1;                    | 439459                    | <a href="#">C01251</a>                             |
| Isocitrate                                 | 0.86          | 1.09  | 1.01   | Energy                 | Krebs cycle                            | LC-MS Pos | 953    | 210    | 20226-99-7;                   | 1198                      | <a href="#">C00311</a>                             |
| Malate                                     | 0.96          | 1.10  | 1.01   | Energy                 | Krebs cycle                            | GC-MS     | 1502   | 233    | 6915-15-7;                    | 525                       | <a href="#">C00149</a>                             |
| Phosphate                                  | 0.86          | 1.18  | 1.25   | Energy                 | Oxidative phosphorylation              | GC-MS     | 1307.7 | 298.9  | 7664-38-2;                    | 1061                      | <a href="#">C00009</a>                             |
| Succinate                                  | 0.38          | 0.99  | 0.99   | Energy                 | Krebs cycle                            | GC-MS     | 1348   | 247    | 110-15-6;                     | 1110                      | <a href="#">C00042</a>                             |
| 1,2-Propanediol                            | 0.66          | 1.55  | 1.03   | Lipid                  | Ketone bodies                          | GC-MS     | 1041   | 117    | 57-55-6;                      |                           | <a href="#">C00717,C02912,C00583,C01506,C02917</a> |
| 2-Hydroxyadipate                           | 0.69          | 1.01  | 0.68   | Lipid                  | Fatty acid, dicarboxylate              | LC-MS Pos | 1703   | 180.1  | 18294-85-4;                   | 193530                    | <a href="#">C02360</a>                             |
| 2-Hydroxyglutarate                         | 0.50          | 1.05  | 1.01   | Lipid                  | Fatty acid, dicarboxylate              | GC-MS     | 1576   | 247    | 40951-21-1;                   | 43                        | <a href="#">C02630</a>                             |
| 2-Phenylethanol                            | 0.94          | 1.46  | 1.16   | Lipid                  | Fatty acid, dicarboxylate              | GC-MS     | 1272   | 179.14 | 60-12-8;                      | 6054                      | <a href="#">C05853,D00192</a>                      |
| 3-Isopropylmalate                          | 0.41          | 0.77  | 0.74   | Lipid                  | Fatty acid, dicarboxylate              | GC-MS     | 1571.7 | 275.2  | 16048-89-8;                   | 36                        |                                                    |
| 4-Hydroxybutyrate (GHB)                    | 0.72          | 1.08  | 0.78   | Lipid                  | Fatty acid, monohydroxy                | GC-MS     | 1277   | 233.1  | 502-85-2;                     | 10413                     | <a href="#">C00989</a>                             |
| Acetylcarnitine (C2)                       | 0.76          | 0.92  | 1.59   | Lipid                  | Carnitine metabolism                   | LC-MS Pos | 1203   | 204.2  | 5080-50-2;                    | 7045767                   | <a href="#">C02571</a>                             |
| Caprate (10:0)                             | 0.67          | 1.69  | 1.21   | Lipid                  | Medium-chain fatty acid                | LC-MS Neg | 5092   | 171.2  | 112-37-8;                     | 2969                      | <a href="#">C01571</a>                             |
| Carnitine                                  | 0.67          | 0.72  | 1.08   | Lipid                  | Carnitine metabolism                   | LC-MS Pos | 702    | 162.2  | 461-05-2;                     | 10917                     |                                                    |
| Ethanolamine                               | 0.56          | 1.32  | 1.19   | Lipid                  | Glycerolipid metabolism                | GC-MS     | 1074   | 102    | 141-43-5;                     |                           | <a href="#">C00189</a>                             |
| Glycerol                                   | 0.72          | 1.13  | 0.97   | Lipid                  | Glycerolipid metabolism                | GC-MS     | 1311   | 205    | 56-81-5;                      | 753                       | <a href="#">C00116</a>                             |
| Glycerol 3-phosphate (G3P)                 | 0.47          | 0.97  | 1.47   | Lipid                  | Glycerolipid metabolism                | GC-MS     | 1719.7 | 357.1  | 29849-82-9;                   | 754                       | <a href="#">C00093</a>                             |

## Supplemental Data for:

Richter, C.L., A.D. Kennedy, L. Guo, and N. Dokoozlian

Metabolomic measurements at three time points of a Chardonnay wine fermentation with *Saccharomyces cerevisiae*.

Am. J. Enol. Vitic. 66:294-301. doi: 10.5344/ajev.2015.14062.

**Supplemental Table 2** The complete exo-metabolome identified in this study. Compound names are reported, along with their CAS, PUBCHEM, and KEGG identifiers. The biological pathway to which the compound belongs, the method of identification, the retention index (RI), and the sizes of the metabolites are also listed. Normalized concentrations of each compound are shown for the three time points.

| Compound                                   | Concentration |       |        | Super pathway | Subpathway                                           | Platform  | RI     | Mass  | Identifier        |         |                        |
|--------------------------------------------|---------------|-------|--------|---------------|------------------------------------------------------|-----------|--------|-------|-------------------|---------|------------------------|
|                                            | Day 4         | Day 9 | Day 15 |               |                                                      |           |        |       | CAS               | PUBCHEM | KEGG                   |
| Glycerophosphoethanolamine                 | 0.47          | 1.19  | 6.80   | Lipid         | Glycerolipid metabolism                              | GC-MS     | 1906   | 357.1 | 33049-08-0;       | 123874  | <a href="#">C01233</a> |
| Glycerophosphorylcholine (GPC)             | 0.07          | 0.85  | 2.04   | Lipid         | Glycerolipid metabolism                              | LC-MS Pos | 694    | 258.1 | 28319-77-9;       | 657272  | <a href="#">C00670</a> |
| Inositol 1-phosphate (I1P)                 | 2.03          | 0.90  | 0.71   | Lipid         | Inositol metabolism                                  | GC-MS     | 2057.8 | 318.1 | 106032-59-1;      |         |                        |
| Inositol 2-phosphate (I2P)                 | 2.77          | 1.46  | 0.51   | Lipid         | Inositol metabolism                                  | GC-MS     | 2072.9 | 318.1 |                   |         | <a href="#">C01177</a> |
| Mevalonolactone                            | 0.75          | 1.00  | 1.00   | Lipid         | Mevalonate metabolism                                | LC-MS Pos | 1784   | 131.1 | 674-26-0;         | 10428   |                        |
| myo-Inositol                               | 0.62          | 0.95  | 1.26   | Lipid         | Inositol metabolism                                  | GC-MS     | 1924.9 | 217   | 87-89-8;          |         | <a href="#">C00137</a> |
| scyllo-Inositol                            | 0.77          | 0.91  | 1.21   | Lipid         | Inositol metabolism                                  | GC-MS     | 1893.8 | 318.2 | 488-59-5;         |         | <a href="#">C06153</a> |
| Taurocholate                               | 0.95          | 0.95  | 0.90   | Lipid         | Bile acid metabolism                                 | LC-MS Neg | 5122   | 514.3 | 145-42-6;         |         | <a href="#">C05122</a> |
| 2'-O-Methylguanosine                       | 0.79          | 0.72  | 0.62   | Nucleotide    | Purine metabolism, guanine containing                | LC-MS Pos | 1926   | 298   | 2140-71-8;        |         | <a href="#">C04545</a> |
| 5-Methyluridine (ribothymidine)            | 0.73          | 1.15  | 0.76   | Nucleotide    | Pyrimidine metabolism, uracil containing             | LC-MS Neg | 1774   | 257.1 | 1463-10-1;        | 445408  |                        |
| Adenine                                    | 0.74          | 3.10  | 9.74   | Nucleotide    | Purine metabolism, adenine containing                | LC-MS Pos | 1003   | 136.1 | 73-24-5;          | 190     | <a href="#">C00147</a> |
| Adenosine                                  | 1.05          | 0.94  | 1.26   | Nucleotide    | Purine metabolism, adenine containing                | LC-MS Pos | 1650   | 268.1 | 58-61-7;          | 60961   | <a href="#">C00212</a> |
| Cytidine                                   | 0.68          | 1.05  | 2.47   | Nucleotide    | Pyrimidine metabolism, cytidine containing           | LC-MS Pos | 1065   | 244   | 65-46-3;          | 6175    | <a href="#">C00475</a> |
| N <sub>6</sub> -carbamoylthreonyladenosine | 1.06          | 0.91  | 0.99   | Nucleotide    | Purine metabolism, guanine containing                | LC-MS Pos | 2656   | 413   | 24719-82-2;       |         |                        |
| Pseudouridine                              | 0.58          | 0.98  | 1.02   | Nucleotide    | Pyrimidine metabolism, uracil containing             | LC-MS Neg | 1104   | 243.1 | 1445-07-4;        |         | <a href="#">C02067</a> |
| Uracil                                     | 0.27          | 0.90  | 1.08   | Nucleotide    | Pyrimidine metabolism, uracil containing             | GC-MS     | 1370.4 | 241   | 66-22-8;          | 1174    | <a href="#">C00106</a> |
| Urate                                      | 0.49          | 0.99  | 1.22   | Nucleotide    | Purine metabolism, urate metabolism                  | GC-MS     | 1928   | 441.2 | 69-93-2;120K5305; |         | <a href="#">C00366</a> |
| Uridine                                    | 0.14          | 0.80  | 1.13   | Nucleotide    | Pyrimidine metabolism, uracil containing             | LC-MS Neg | 1467   | 243.1 | 58-96-8;          | 6029    | <a href="#">C00299</a> |
| Xanthine                                   | 0.10          | 0.80  | 1.19   | Nucleotide    | Purine metabolism, (hypo)xanthine-inosine containing | GC-MS     | 1889.9 | 353   | 69-89-6;          | 1188    | <a href="#">C00385</a> |
| Alanylvaline                               | 0.86          | 1.33  | 6.06   | Peptide       | Dipeptide                                            | LC-MS Pos | 1513   | 189   |                   | 137276  |                        |
| g-Glutamylisoleucine                       | 0.93          | 0.31  | 0.81   | Peptide       | gamma-glutamyl                                       | LC-MS Pos | 2644   | 261.2 |                   |         |                        |
| g-Glutamylleucine                          | 1.04          | 0.93  | 0.99   | Peptide       | gamma-glutamyl                                       | LC-MS Pos | 2744   | 261.2 | 2566-39-4;        | 151023  |                        |
| g-Glutamylphenylalanine                    | 1.15          | 1.01  | 1.11   | Peptide       | gamma-glutamyl                                       | LC-MS Pos | 2846   | 295.1 | 7432-24-8;        | 111299  |                        |
| g-Glutamyltyrosine                         | 1.19          | 1.02  | 0.93   | Peptide       | gamma-glutamyl                                       | LC-MS Pos | 2073   | 311.2 | 7432-23-7;        | 94340   |                        |
| g-Glutamylvaline                           | 0.98          | 1.02  | 1.25   | Peptide       | gamma-glutamyl                                       | LC-MS Pos | 2040   | 247.2 | 2746-34-1;        |         |                        |

## Supplemental Data for:

Richter, C.L., A.D. Kennedy, L. Guo, and N. Dokoozlian

Metabolomic measurements at three time points of a Chardonnay wine fermentation with *Saccharomyces cerevisiae*.

Am. J. Enol. Vitic. 66:294-301. doi: 10.5344/ajev.2015.14062.

**Supplemental Table 2** The complete exo-metabolome identified in this study. Compound names are reported, along with their CAS, PUBCHEM, and KEGG identifiers. The biological pathway to which the compound belongs, the method of identification, the retention index (RI), and the sizes of the metabolites are also listed. Normalized concentrations of each compound are shown for the three time points.

| Compound                      | Concentration |       |        | Super pathway | Subpathway                      | Platform  | RI     | Mass  | Identifier   |                 |                        |
|-------------------------------|---------------|-------|--------|---------------|---------------------------------|-----------|--------|-------|--------------|-----------------|------------------------|
|                               | Day 4         | Day 9 | Day 15 |               |                                 |           |        |       | CAS          | PUBCHEM         | KEGG                   |
| Glycylleucine                 | 0.52          | 1.51  | 1.66   | Peptide       | Dipeptide                       | LC-MS Pos | 2236   | 189.1 | 869-19-2;    | 928,431,548,899 | <a href="#">C02155</a> |
| Isoleucylisoleucine           | 0.79          | 0.82  | 1.19   | Peptide       | Dipeptide                       | LC-MS Pos | 2678   | 245.1 | 42537-99-5;  |                 |                        |
| Isoleucylleucine              | 0.93          | 1.91  | 6.87   | Peptide       | Dipeptide                       | LC-MS Pos | 2856   | 245.1 | 26462-22-6;  | 11644431        |                        |
| Leu-Leu-Leu                   | 0.69          | 0.91  | 5.99   | Peptide       | Polypeptide                     | LC-MS Pos | 3795   | 358.2 | 10329-75-6;  | 259327          |                        |
| Leucylalanine                 | 0.64          | 0.91  | 4.86   | Peptide       | Dipeptide                       | LC-MS Pos | 1760   | 203.2 | 7298-84-2;   | 259321          |                        |
| Leucylleucine                 | 0.75          | 1.69  | 7.23   | Peptide       | Dipeptide                       | LC-MS Pos | 3012   | 245.1 | 3303-31-9;   | 768,076,992,072 | <a href="#">C11332</a> |
| Phenylalanylleucine           | 0.41          | 0.88  | 4.21   | Peptide       | Dipeptide                       | LC-MS Pos | 3273   | 279.2 | 3303-55-7;   | 4078229         |                        |
| 1,4-Butanediol                | 1.18          | 1.32  | 0.71   | Xenobiotics   | Chemical                        | GC-MS     | 1208   | 115.8 | 110-63-4;    |                 |                        |
| 2-Pyrrolidinone               | 1.00          | 1.83  | 1.68   | Xenobiotics   | Chemical                        | GC-MS     | 1190.9 | 142   | 616-45-5;    | 12025           |                        |
| 3,4-Dihydroxybenzaldehyde     | 1.22          | 0.82  | 0.82   | Xenobiotics   | Food component/plant            | GC-MS     | 1615   | 267.1 | 139-85-5;    | 8768            |                        |
| 3,4-Dihydroxyphenylethanol    | 0.53          | 1.18  | 1.43   | Xenobiotics   | Food component/plant            | GC-MS     | 1727   | 267.1 | 10597-60-1;  |                 |                        |
| 3-Deoxyoctulosonate           | 0.82          | 0.99  | 1.07   | Xenobiotics   | Bacterial                       | GC-MS     | 1942   | 373.2 | 103404-70-2; | 4636210         |                        |
| 4-Hydroxy catechol            | 1.75          | 1.32  | 0.77   | Xenobiotics   | Benzoate metabolism             | GC-MS     | 1599   | 342.2 | 533-73-3;    | 10787           | <a href="#">C02814</a> |
| Abscisate                     | 1.01          | 0.94  | 0.92   | Xenobiotics   | Food component/plant            | LC-MS Neg | 3195   | 263.1 | 14375-45-2;  | 5280896         | <a href="#">C06082</a> |
| Allose                        | 0.93          | 0.93  | 0.94   | Xenobiotics   | Food component/plant            | GC-MS     | 1782.8 | 204   | 7283-09-2;   | 102288          | <a href="#">C01487</a> |
| Erythritol                    | 0.64          | 1.23  | 1.30   | Xenobiotics   | Sugar, sugar substitute, starch | GC-MS     | 1517.5 | 217   | 149-32-6;    |                 | <a href="#">C00503</a> |
| Galactarate (mucic acid)      | 0.92          | 1.02  | 1.01   | Xenobiotics   | Sugar, sugar substitute, starch | GC-MS     | 1899.3 | 333.1 | 526-99-8;    | 3037582         | <a href="#">C00879</a> |
| Galactonate                   | 1.10          | 1.09  | 0.93   | Xenobiotics   | Food component/plant            | LC-MS Neg | 655    | 195.1 | 299-28-5;    | 128869          | <a href="#">C00880</a> |
| Galacturonate                 | 0.63          | 1.02  | 1.20   | Xenobiotics   | Sugar, sugar substitute, starch | GC-MS     | 1888.7 | 204   | 91510-62-2;  | 84740           | <a href="#">C08348</a> |
| Glycolate (hydroxyacetate)    | 2.14          | 1.36  | 0.48   | Xenobiotics   | Chemical                        | GC-MS     | 1119   | 177   | 79-14-1;     | 3,698,251,757   | <a href="#">C00160</a> |
| Kaempferol 3-O-beta-glucoside | 1.19          | 0.96  | 0.73   | Xenobiotics   | Food component/plant            | LC-MS Pos | 3884   | 449   | 480-10-4;    |                 |                        |
| Lidocaine                     | 0.20          | 0.55  | 1.68   | Xenobiotics   | Drug                            | LC-MS Pos | 2761   | 235.2 | 137-58-6;    | 3676            | <a href="#">D00358</a> |
| Luteolin-7-O-glucoside        | 1.38          | 1.02  | 0.87   | Xenobiotics   | Food component/plant            | LC-MS Pos | 3590   | 448.9 | 5373-11-5;   | 5280637         | <a href="#">C03951</a> |
| p-Aminobenzoate (PABA)        | 0.44          | 0.79  | 1.10   | Xenobiotics   | Benzoate metabolism             | LC-MS Pos | 2120   | 138.1 | 150-13-0;    | 7,057,990,978   | <a href="#">C00568</a> |
| Quercetin                     | 1.06          | 1.12  | 1.59   | Xenobiotics   | Food component/plant            | GC-MS     | 2318.5 | 647.4 | 849061-97-8; | 5280343         | <a href="#">C00389</a> |
| Quercetin-3-galactoside       | 1.34          | 0.81  | 0.63   | Xenobiotics   | Food component/plant            | LC-MS Neg | 2706   | 463.2 | 482-36-0;    | 5281643         | <a href="#">C10073</a> |
| Quercetin-3-O-glucoside       | 1.21          | 0.90  | 0.92   | Xenobiotics   | Food component/plant            | LC-MS Pos | 3649   | 464.8 | 21637-25-2;  |                 |                        |
| Shikimate                     | 0.88          | 0.88  | 1.04   | Xenobiotics   | Food component/plant            | GC-MS     | 1758.1 | 204   | 138-59-0;    | 8742            | <a href="#">C00493</a> |
| Sophorose                     | 0.61          | 1.08  | 0.99   | Xenobiotics   | Sugar, sugar substitute, starch | GC-MS     | 2193.1 | 204.1 | 20429-79-2;  | 88719           | <a href="#">C08250</a> |
| Tartarate                     | 0.98          | 1.06  | 0.93   | Xenobiotics   | Food component/plant            | GC-MS     | 1626.1 | 292.1 | 6106-24-7;   | 875             | <a href="#">C00898</a> |
| Trihydroxybutane              | 0.80          | 1.58  | 1.28   | Xenobiotics   | Food component/plant            | GC-MS     | 1329.5 | 117   | 4435-50-1;   | 20497           |                        |
